# Supplementary material for: Outsourcing health-care services to the private sector and treatable mortality rates in England, 2013–20: an observational study of NHS privatisation
Source: PubMed Central journal article supplement (PMC10932752; doi:10.1016/s2468-2667(22)00133-5), 2022-06-29
Supplement: mmc1.pdf [file mmc1.pdf]

# THE LANCET

## Public Health

### **Supplementary appendix**

This appendix formed part of the original submission and has been peer reviewed. We post it as supplied by the authors.

Supplement to: Goodair B, Reeves A. Outsourcing health-care services to the private sector and treatable mortality rates in England, 2013–20: an observational study of NHS privatisation. *Lancet Public Health* 2022; **7**: e638–46.

## Supplementary Material

### Contents

|                                                                      |    |
|----------------------------------------------------------------------|----|
| Main Findings.....                                                   | 3  |
| S.1. Full Models of Main Finding.....                                | 3  |
| S.2 Full Model Specifications .....                                  | 4  |
| S.3. Models without log transformations of Treatable Mortality.....  | 5  |
| S.4. Standard Industrial Class.....                                  | 6  |
| S.4.1 Division Groupings .....                                       | 6  |
| S.4.2 Classes .....                                                  | 7  |
| S.4.3 Removing General Medical Practices.....                        | 8  |
| S.5 Time Fixed Effects .....                                         | 9  |
| S.6. Nonparametric Covariate Balancing using Propensity Scores ..... | 10 |
| S.7. Regression on absolute numbers of deaths.....                   | 11 |
| S.8 Additional deaths plot.....                                      | 12 |
| Sensitivity Checks.....                                              | 13 |
| S.9. Falsification test .....                                        | 13 |
| S.10. Dropping individual CCGs.....                                  | 14 |
| S.10.1 Plotting results .....                                        | 14 |
| S.10.2. Full Model removing East Staffordshire.....                  | 15 |
| S.11. Specification curve .....                                      | 16 |
| S.12. Combined Specification curve and random error simulation ..... | 17 |
| S.12.1. Plotting all specification coefficients together .....       | 17 |
| S.12.2. Selected specifications .....                                | 18 |
| S.13. Matching .....                                                 | 19 |
| Additional Analyses.....                                             | 20 |
| S.14. Quadratic term.....                                            | 20 |
| S.14. Growth curve models.....                                       | 20 |
| S.14.1 Unconditional growth model.....                               | 20 |
| S.14.2 Conditional growth model .....                                | 21 |
| S.15 Difference in Difference .....                                  | 21 |
| S.15.1 DiD Table .....                                               | 22 |
| S.15.2 DiD graph.....                                                | 22 |
| S.16. Interactions terms.....                                        | 23 |
| S.16.1 Interaction with austerity .....                              | 23 |
| S.16.2 Interaction with demographics.....                            | 24 |

|                                                              |    |
|--------------------------------------------------------------|----|
| S.16.3 Interaction between deprived and affluent CCGs .....  | 25 |
| S.17. Spatial autocorrelation.....                           | 26 |
| S.18. Zoomed in maps.....                                    | 27 |
| S.19. Ethnicity breakdown .....                              | 27 |
| Data.....                                                    | 28 |
| S.20. Data Cleaning .....                                    | 28 |
| S.21. Missing Data .....                                     | 28 |
| S.21.1 Missing Data of CCG Expenditure and Mortality .....   | 29 |
| S.22. Model Data Summary .....                               | 30 |
| S.23. Data Locations.....                                    | 30 |
| S.24. Causes of Treatable Mortality.....                     | 32 |
| S.25. CCG Level data .....                                   | 34 |
| S.25.1 Table of Outsourcing and Treatable Mortality.....     | 34 |
| S.25.2 Stripe plot.....                                      | 36 |
| Reporting Checklists and Statements .....                    | 37 |
| S.26. STROBE Checklist.....                                  | 37 |
| S.27. GATHER Checklist .....                                 | 40 |
| S.28. Study protocol and data analysis plan statements ..... | 42 |

## Main Findings

### S.1. Full Models of Main Finding

Our main findings regress levels of outsourcing on the age standardised rate of treatable mortality. Here we present out full findings with an additional decimal place.

|                                        | ln(T. Mortality)                              |                                              |                                              |                                               |                                                  |
|----------------------------------------|-----------------------------------------------|----------------------------------------------|----------------------------------------------|-----------------------------------------------|--------------------------------------------------|
|                                        | FE                                            | FD                                           | CBPS (1)                                     | CBPS (2)                                      | MLM                                              |
| For-profit Outsourcing (%)             | 0.00382***<br>(0.00083)<br>[0.00163, 0.00601] | 0.00458**<br>(0.00082)<br>[0.00184, 0.00733] | 0.00372**<br>(0.00092)<br>[0.00142, 0.00602] | 0.00390***<br>(0.00090)<br>[0.00162, 0.00618] | 0.00265*<br>(0.00121)<br>[0.00027, 0.00503]      |
| LA Spend (£000s per person)            | 0.00390<br>(0.02058)<br>[-0.05147, 0.05927]   | -0.00231<br>(0.02427)<br>[-0.05996, 0.05534] | -0.00168<br>(0.06302)<br>[-0.09739, 0.09404] | -0.00535<br>(0.06169)<br>[-0.09991, 0.08921]  | 0.02022<br>(0.01689)<br>[-0.01288, 0.05333]      |
| Total CCG Spend (£Ms)                  | 0.00036<br>(0.00065)<br>[-0.00070, 0.00142]   | 0.00077<br>(0.00074)<br>[-0.00050, 0.00203]  | 0.00016<br>(0.00063)<br>[-0.00107, 0.00139]  | -0.00005<br>(0.00059)<br>[-0.00119, 0.00109]  | -0.00008<br>(0.00012)<br>[-0.00031, 0.00015]     |
| Claimant Rate (%)                      | 0.01312<br>(0.01768)<br>[-0.01507, 0.04131]   | -0.00004<br>(0.01731)<br>[-0.02453, 0.02446] | 0.01168<br>(0.01756)<br>[-0.01806, 0.04143]  | 0.00981<br>(0.01709)<br>[-0.01919, 0.03880]   | 0.10356***<br>(0.01008)<br>[0.08380, 0.12333]    |
| Population size                        | 0.45023<br>(0.59924)<br>[-0.61794, 1.51839]   | 0.75287<br>(0.87935)<br>[-1.09082, 2.59656]  | 0.55075<br>(0.58182)<br>[-0.57719, 1.67869]  | 0.69691<br>(0.55785)<br>[-0.39847, 1.79230]   | 0.01680<br>(0.01755)<br>[-0.01760, 0.05120]      |
| Unemployment Rate (%)                  | 0.00236<br>(0.00317)<br>[-0.00352, 0.00825]   | 0.00429<br>(0.00363)<br>[-0.00164, 0.01022]  | 0.00227<br>(0.00323)<br>[-0.00384, 0.00838]  | 0.00229<br>(0.00315)<br>[-0.00370, 0.00828]   | -0.00216<br>(0.00306)<br>[-0.00815, 0.00383]     |
| Ethnic Minority (%)                    | 0.00204<br>(0.00207)<br>[-0.00221, 0.00628]   | 0.00352<br>(0.00187)<br>[-0.00081, 0.00785]  | 0.00107<br>(0.00206)<br>[-0.00340, 0.00555]  | 0.00135<br>(0.00202)<br>[-0.00301, 0.00571]   | 0.00773***<br>(0.00084)<br>[0.00609, 0.00937]    |
| Degree Education (%)                   | -0.00047<br>(0.00160)<br>[-0.00345, 0.00250]  | -0.00140<br>(0.00163)<br>[-0.00470, 0.00191] | -0.00005<br>(0.00164)<br>[-0.00329, 0.00320] | 0.00000<br>(0.00148)<br>[-0.00304, 0.00305]   | -0.00314***<br>(0.00093)<br>[-0.00496, -0.00133] |
| Average Disposable H.hold Income       | -0.16263<br>(0.24267)<br>[-0.70864, 0.38338]  | 0.34805<br>(0.25223)<br>[-0.08845, 0.78455]  | -0.15460<br>(0.28198)<br>[-0.78957, 0.48037] | -0.10422<br>(0.27891)<br>[-0.72355, 0.51512]  | -0.36340***<br>(0.04471)<br>[-0.45104, -0.27576] |
| Managerial/Professional occupation (%) | -0.00224<br>(0.00183)<br>[-0.00553, 0.00105]  | -0.00164<br>(0.00176)<br>[-0.00505, 0.00177] | -0.00111<br>(0.00157)<br>[-0.00473, 0.00250] | -0.00125<br>(0.00150)<br>[-0.00470, 0.00221]  | -0.00073<br>(0.00113)<br>[-0.00294, 0.00147]     |
| SD (Observations)                      |                                               |                                              |                                              |                                               | 0.28188                                          |
| Num.Obs.                               | 609                                           | 450                                          | 517                                          | 553                                           | 534                                              |
| R2                                     | 0.040                                         | 0.048                                        | 0.896                                        | 0.893                                         |                                                  |
| R2 Adj.                                | -0.342                                        | 0.026                                        | 0.854                                        | 0.852                                         |                                                  |
| R2 Marg.                               |                                               |                                              |                                              |                                               | 0.717                                            |
| R2 Cond.                               |                                               |                                              |                                              |                                               | 0.813                                            |
| AIC                                    |                                               |                                              | -1145.2                                      | -1230.2                                       | -962.6                                           |
| BIC                                    |                                               |                                              | -516.4                                       | -552.7                                        | -894.1                                           |
| ICC                                    |                                               |                                              |                                              |                                               | 0.3                                              |
| Log.Lik.                               |                                               |                                              | 720.576                                      | 772.087                                       |                                                  |
| RMSE                                   |                                               |                                              |                                              |                                               | 0.08                                             |
| CCG Fixed Effects                      | Yes                                           | Yes                                          | Yes                                          | Yes                                           | No                                               |
| Time Fixed Effects                     | Yes                                           | Yes                                          | Yes                                          | Yes                                           | Yes                                              |
| Clustered Standard Errors              | Yes                                           | Yes                                          | Yes                                          | Yes                                           | Yes                                              |

+ p < 0.1, \* p < 0.05, \*\* p < 0.01, \*\*\* p < 0.001

Outsourcing, LA Spend, and CCG Spend have a one-year lag.

Tr. Mortality, Population and GDHI are log transformed, 'Ln' denotes the natural log of outcome variable.

For full model expressions see supplementary material (sX)

Robust SEs are clustered at individual level and use a bias-reduced linearization estimator (CR2)

Satterthwaite degrees of freedom used in MLM

An ICC of 0.3 suggests a low level of the variation in LA mortality rates is explained by clustering at the CCG level. Given the imperfect nature of overlapping CCG and LA boundaries a low ICC may be expected.

## S.2 Full Model Specifications

Our primary model 1 is a fixed effects model with fixed effects for year and CCG. The model is:

$$MORT_{it} = \beta OUT_{it} + \beta LASPEND_{it} + \beta CCGSPEND_{it} + \beta CLAIM_{it} + \beta POP_{it} + \beta UNEMP_{it} \\ + \beta ETHMIN_{it} + \beta DEG_{it} + \beta INC_{it} + \beta OCC_{it} + \alpha_i + \mu_{it}$$

Where  $i$  is a given CCG,  $t$  is a given year, MORT is treatable mortality rate, OUT is for-profit outsourcing, LASPEND is Local Authority expenditure per person, CCGSPEND is total CCG expenditure, CLAIM is the claimant rate, POP is the CCG rough geographic area population, UNEMP is the unemployment rate, ETHMIN is the percent of population who are ethnic minorities, DEG is the percent of population with qualification level 4 or above, INC is the average gross disposable household income, OCC is the percent of the working population who are in managerial or professional occupations,  $\alpha_i$  is the unobserved time-invariant individual effect and  $\mu_{it}$  is the error term.

The second model is a first-differences model. The full specification of which is:

$$MORT_{it} - MORT_{it-1} \\ = \beta(OUT_{it} - OUT_{it-1}) + \beta(LASPEND_{it} - LASPEND_{it-1}) \\ + \beta(CCGSPEND_{it} - CCGSPEND_{it-1}) + \beta(CLAIM_{it} - CLAIM_{it-1}) \\ + \beta(POP_{it} - POP_{it-1}) + \beta(UNEMP_{it} - UNEMP_{it-1}) \\ + \beta(ETHMIN_{it} - ETHMIN_{it-1}) + \beta(DEG_{it} - DEG_{it-1}) + \beta(INC_{it} - INC_{it-1}) \\ + \beta(OCC_{it} - OCC_{it-1}) + (\alpha_i - \alpha_i) + (\mu_{it} - \mu_{it-1})$$

The third and fourth model are fixed effects models, where the observations are weighted based on the number of GPs in each CCG in model 3 and the treatable mortality rate in 2013 for model 4. We use the non-parametric covariate balancing using propensity scores method advocated by Fong, Hazlett and Imai (2018). In which the weights,  $w_i$ , for observations are (stabilized) inverse generalized propensity score weights. They are specified as

$$w_i = \frac{f(T_i^*)}{f(T_i^* | X_i^*)'}$$

In which  $T$  is our treatment of for-profit outsourcing and  $X$  is our covariates of number of GPs and treatable mortality rate in 2013.  $f(T_i^*)$  represents the marginal distribution of treatments and  $f(T_i^* | X_i^*)'$  represents the generalised propensity score.

The final model, model 5, is a random intercepts multilevel model where the individual,  $i$ , is Local authority, within a group of CCGs denoted as  $j$  at time  $t$ .

$$MORT_{ijt} = \beta OUT_{jt} + \beta LASPEND_{ijt} + \beta CCGSPEND_{jt} + \beta CLAIM_{ijt} + \beta POP_{ijt} + \beta UNEMP_{ijt} \\ + \beta ETHMIN_{ijt} + \beta DEG_{ijt} + \beta INC_{ijt} + \beta OCC_{ijt} + \alpha_{jt} + \mu_{ijt}$$

Where  $\alpha_{jt}$  represents the CCG random effect residual and  $\mu_{ijt}$  the individual LA effect residual.

### S.3. Models without log transformations of Treatable Mortality

To calculate an absolute change to mortality rate associated with changes in outsourcing, we run our models without any log transformation to the treatable mortality rate. We present the results below

|                                        | T. Mortality                             |                                           |                                          |                                          |                                             |
|----------------------------------------|------------------------------------------|-------------------------------------------|------------------------------------------|------------------------------------------|---------------------------------------------|
|                                        | FE                                       | FD                                        | CBPS (1)                                 | CBPS (2)                                 | MLM                                         |
| For-profit Outsourcing (%)             | 0.291**<br>(0.074)<br>[0.094, 0.488]     | 0.340**<br>(0.066)<br>[0.092, 0.587]      | 0.281*<br>(0.082)<br>[0.067, 0.495]      | 0.297**<br>(0.082)<br>[0.087, 0.508]     | 0.193*<br>(0.095)<br>[0.007, 0.379]         |
| LA Spend (£000s per person)            | 0.891<br>(1.872)<br>[-4.107, 5.889]      | -0.066<br>(2.258)<br>[-5.258, 5.125]      | 1.222<br>(6.223)<br>[-7.678, 10.122]     | 0.879<br>(6.085)<br>[-7.850, 9.608]      | 1.847<br>(1.318)<br>[-0.737, 4.430]         |
| Total CCG Spend (EMs)                  | 0.030<br>(0.057)<br>[-0.066, 0.126]      | 0.068<br>(0.072)<br>[-0.045, 0.182]       | 0.017<br>(0.058)<br>[-0.097, 0.131]      | 0.003<br>(0.054)<br>[-0.103, 0.108]      | -0.007<br>(0.009)<br>[-0.025, 0.011]        |
| Claimant Rate (%)                      | 0.460<br>(1.867)<br>[-2.085, 3.004]      | -0.183<br>(1.817)<br>[-2.389, 2.023]      | 0.290<br>(1.953)<br>[-2.476, 3.056]      | 0.130<br>(1.904)<br>[-2.546, 2.807]      | 8.347***<br>(0.786)<br>[6.807, 9.888]       |
| Population size                        | 33.259<br>(53.052)<br>[-63.164, 129.681] | 53.357<br>(72.599)<br>[-112.665, 219.379] | 40.020<br>(54.743)<br>[-64.867, 144.908] | 52.708<br>(52.729)<br>[-48.407, 153.823] | 0.643<br>(1.367)<br>[-2.036, 3.323]         |
| Unemployment Rate (%)                  | 0.325<br>(0.282)<br>[-0.207, 0.856]      | 0.426<br>(0.331)<br>[-0.108, 0.960]       | 0.332<br>(0.304)<br>[-0.236, 0.900]      | 0.338<br>(0.297)<br>[-0.215, 0.891]      | -0.111<br>(0.238)<br>[-0.577, 0.355]        |
| Ethnic Minority (%)                    | 0.100<br>(0.185)<br>[-0.283, 0.484]      | 0.238<br>(0.168)<br>[-0.152, 0.627]       | 0.036<br>(0.184)<br>[-0.380, 0.452]      | 0.062<br>(0.179)<br>[-0.341, 0.465]      | 0.675***<br>(0.065)<br>[0.548, 0.803]       |
| Degree Education (%)                   | -0.034<br>(0.137)<br>[-0.303, 0.235]     | -0.101<br>(0.143)<br>[-0.399, 0.196]      | 0.003<br>(0.142)<br>[-0.298, 0.305]      | 0.000<br>(0.128)<br>[-0.282, 0.281]      | -0.276***<br>(0.072)<br>[-0.417, -0.134]    |
| Average Disposable H.hold Income       | -15.709<br>(20.903)<br>[-64.997, 33.579] | 30.010<br>(23.372)<br>[-9.296, 69.316]    | -17.041<br>(25.146)<br>[-76.087, 42.005] | -12.325<br>(24.667)<br>[-69.496, 44.845] | -25.750***<br>(3.489)<br>[-32.588, -18.911] |
| Managerial/Professional occupation (%) | -0.163<br>(0.136)<br>[-0.460, 0.134]     | -0.115<br>(0.141)<br>[-0.423, 0.192]      | -0.111<br>(0.133)<br>[-0.448, 0.225]     | -0.116<br>(0.126)<br>[-0.435, 0.203]     | -0.040<br>(0.088)<br>[-0.212, 0.131]        |
| SD (Observations)                      |                                          |                                           |                                          |                                          | 2.486                                       |
| Num.Obs.                               | 609                                      | 450                                       | 517                                      | 553                                      | 534                                         |
| R2                                     | 0.029                                    | 0.037                                     | 0.890                                    | 0.889                                    |                                             |
| R2 Adj.                                | -0.357                                   | 0.015                                     | 0.847                                    | 0.845                                    |                                             |
| R2 Marg.                               |                                          |                                           |                                          |                                          | 0.715                                       |
| R2 Cond.                               |                                          |                                           |                                          |                                          | 0.815                                       |
| AIC                                    |                                          |                                           | 3541.4                                   | 3774.6                                   | 3566.6                                      |
| BIC                                    |                                          |                                           | 4170.2                                   | 4452.2                                   | 3635.1                                      |
| ICC                                    |                                          |                                           |                                          |                                          | 0.4                                         |
| Log.Lik.                               |                                          |                                           | -1622.724                                | -1730.320                                |                                             |
| RMSE                                   |                                          |                                           |                                          |                                          | 5.91                                        |
| CCG Fixed Effects                      | Yes                                      | Yes                                       | Yes                                      | Yes                                      | No                                          |
| Time Fixed Effects                     | Yes                                      | Yes                                       | Yes                                      | Yes                                      | Yes                                         |
| Clustered Standard Errors              | Yes                                      | Yes                                       | Yes                                      | Yes                                      | Yes                                         |

+ p < 0.1, \* p < 0.05, \*\* p < 0.01, \*\*\* p < 0.001

Outsourcing, LA Spend, and CCG Spend have a one year lag.

Population and GDHI are log transformed.

For full model expressions see supplementary material (sX)

Robust SEs are clustered at individual level and use a bias-reduced linearization estimator (CR2)

Satterthwaite degrees of freedom used in MLM

## S.4. Standard Industrial Class

### S.4.1 Division Groupings

We check whether this association is driven by outsourcing to companies with specific Standard Industrial Classification divisions. We aggregate divisions which may form a similar type of business. We find that outsourcing to companies classified as ‘Human health activities’ are statistically significantly associated with increases in treatable mortality rates.

In the below table: ‘Human Health’ refers to SIC division 86; ‘Professional Services’ refers to SIC divisions 70, 82, 62, 69, 74, 63 and 86; ‘Building construction and maintenance’ refers to SIC codes 68 and 41; ‘Social Care’ refers to SIC divisions 87 and 88; ‘Foundational services’ refers to SIC codes 49 and 56; and ‘Other’ refers to all other SIC codes combined. Control variables are just excluded from the table, included in the models.

|                                                                  | ln(T. Mortality)                        |                                        |                                        |                                        |                                         |                                        |
|------------------------------------------------------------------|-----------------------------------------|----------------------------------------|----------------------------------------|----------------------------------------|-----------------------------------------|----------------------------------------|
|                                                                  | (1)                                     | (2)                                    | (3)                                    | (4)                                    | (5)                                     | (6)                                    |
| For-profit Human Health Outsourcing (%)                          | 0.005**<br>(0.001)<br>[0.001,<br>0.008] |                                        |                                        |                                        |                                         |                                        |
| For-profit Professional services Outsourcing (%)                 |                                         | 0.003<br>(0.002)<br>[-0.002,<br>0.008] |                                        |                                        |                                         |                                        |
| For-profit 'Other' Outsourcing (%)                               |                                         |                                        | 0.002<br>(0.002)<br>[-0.005,<br>0.009] |                                        |                                         |                                        |
| For-profit Building construction and maintenance Outsourcing (%) |                                         |                                        |                                        | 0.006+<br>(0.003)<br>[0.000,<br>0.012] |                                         |                                        |
| For-profit Social Care Outsourcing (%)                           |                                         |                                        |                                        |                                        | -0.001<br>(0.012)<br>[-0.020,<br>0.018] |                                        |
| For-profit Foundational Services Outsourcing (%)                 |                                         |                                        |                                        |                                        |                                         | 0.006<br>(0.002)<br>[-0.006,<br>0.017] |
| Num.Obs.                                                         | 609                                     | 609                                    | 609                                    | 609                                    | 609                                     | 609                                    |
| R2                                                               | 0.031                                   | 0.017                                  | 0.015                                  | 0.021                                  | 0.014                                   | 0.016                                  |
| R2 Adj.                                                          | -0.354                                  | -0.374                                 | -0.377                                 | -0.368                                 | -0.378                                  | -0.375                                 |
| CCG Fixed Effects                                                | Yes                                     | Yes                                    | Yes                                    | Yes                                    | Yes                                     | Yes                                    |
| Time Fixed Effects                                               | Yes                                     | Yes                                    | Yes                                    | Yes                                    | Yes                                     | Yes                                    |
| Clustered Standard Errors                                        | Yes                                     | Yes                                    | Yes                                    | Yes                                    | Yes                                     | Yes                                    |
| Control Variables                                                | Yes                                     | Yes                                    | Yes                                    | Yes                                    | Yes                                     | Yes                                    |

+ p < 0.1, \* p < 0.05, \*\* p < 0.01, \*\*\* p < 0.001

Outsourcing, LA Spend, and CCG Spend have a one year lag.

Tr. mortality, Population and GDHI are log transformed, ‘Ln’ denotes the natural log of outcome variable.

Robust SEs are clustered at individual level and use a bias-reduced linearization estimator (CR2)

## S.4.2 Classes

We also analyse the lowest level of SIC within the ‘Human Health’ division to see if there are very specific types of healthcare business whose services are associated with mortality rates. At this scale the distinction between some of the classes is not entirely obvious and many businesses have multiple SIC codes which will include several within the human health division.

We find that “General medical practice activities” have a statistically significant positive association with treatable mortality rates:

|                                                  | ln(T. Mortality)                       |                                         |                                         |                                         |                                        |                                        |
|--------------------------------------------------|----------------------------------------|-----------------------------------------|-----------------------------------------|-----------------------------------------|----------------------------------------|----------------------------------------|
|                                                  | (1)                                    | (2)                                     | (3)                                     | (4)                                     | (5)                                    | (6)                                    |
| For-profit Hospital Outsourcing (%)              | 0.006<br>(0.003)<br>[-0.003,<br>0.015] |                                         |                                         |                                         |                                        |                                        |
| For-profit Dental Outsourcing (%)                |                                        | -0.110<br>(0.265)<br>[-0.486,<br>0.266] |                                         |                                         |                                        |                                        |
| For-profit Medical Nursing Homes Outsourcing (%) |                                        |                                         | -0.040<br>(0.018)<br>[-0.100,<br>0.019] |                                         |                                        |                                        |
| For-profit Specialist Services Outsourcing (%)   |                                        |                                         |                                         | -0.032<br>(0.020)<br>[-0.079,<br>0.016] |                                        |                                        |
| For-profit General Medical Outsourcing (%)       |                                        |                                         |                                         |                                         | 0.005*<br>(0.002)<br>[0.001,<br>0.009] |                                        |
| For-profit Other health Outsourcing (%)          |                                        |                                         |                                         |                                         |                                        | 0.003<br>(0.003)<br>[-0.003,<br>0.010] |
| Num.Obs.                                         | 609                                    | 609                                     | 609                                     | 609                                     | 609                                    | 609                                    |
| R2                                               | 0.018                                  | 0.015                                   | 0.018                                   | 0.018                                   | 0.026                                  | 0.016                                  |
| R2 Adj.                                          | -0.372                                 | -0.377                                  | -0.373                                  | -0.373                                  | -0.362                                 | -0.375                                 |
| CCG Fixed Effects                                | Yes                                    | Yes                                     | Yes                                     | Yes                                     | Yes                                    | Yes                                    |
| Time Fixed Effects                               | Yes                                    | Yes                                     | Yes                                     | Yes                                     | Yes                                    | Yes                                    |
| Clustered Standard Errors                        | Yes                                    | Yes                                     | Yes                                     | Yes                                     | Yes                                    | Yes                                    |
| Control Variables                                | Yes                                    | Yes                                     | Yes                                     | Yes                                     | Yes                                    | Yes                                    |

+ p < 0.1, \* p < 0.05, \*\* p < 0.01, \*\*\* p < 0.001

Outsourcing, LA Spend, and CCG Spend have a one year lag.

Tr. mortality, Population and GDHI are log transformed, ‘Ln’ denotes the natural log of outcome variable.

Robust SEs are clustered at individual level and use a bias-reduced linearization estimator (CR2)

Satterthwaite degrees of freedom used in MLM



### S.4.3 Removing General Medical Practices

To be sure that our entire finding is not driven by a spurious relationship between General Medical Practices and Treatable Mortality, we remove these observations from the overall outsourcing data and rerun the main regression. We find consistent results and can conclude that the relationship is not entirely explained by expenditure on general medical practices.

|                                                                | ln(T. Mortality)<br>(1)                       |
|----------------------------------------------------------------|-----------------------------------------------|
| For-profit Outsourcing (General Medical Practices removed) (%) | 0.00308***<br>(0.00057)<br>[0.00131, 0.00484] |
| <hr/>                                                          |                                               |
| Num.Obs.                                                       | 609                                           |
| R2                                                             | 0.040                                         |
| R2 Adj.                                                        | -0.342                                        |
| CCG Fixed Effects                                              | Yes                                           |
| Time Fixed Effects                                             | Yes                                           |
| Clustered Standard Errors                                      | Yes                                           |
| Control Variables                                              | Yes                                           |

+ p < 0.1, \* p < 0.05, \*\* p < 0.01, \*\*\* p < 0.001

Outsourcing, LA Spend, and CCG Spend have a one year lag.

Tr. mortality, Population and GDHI are log transformed, 'Ln' denotes the natural log of outcome variable.

Robust SEs are clustered at individual level and use a bias-reduced linearization estimator (CR2)

## S.5 Time Fixed Effects

Our main results include fixed effects for year and CCG. Here we present the coefficients of the fixed effects for year and the intercept in the full model. '2014' will be treated as reference categories – bearing in mind we regress 2013 outsourcing against 2014 mortality rates, so we do not have a 2013 year.

|                           | ln(T. Mortality)                              |
|---------------------------|-----------------------------------------------|
|                           | FE                                            |
| (Intercept)               | 0.60057<br>(7.69460)<br>[-13.10224, 14.30338] |
| factor(year)2015          | 0.00871<br>(0.02100)<br>[-0.00554, 0.00105]   |
| factor(year)2016          | 0.00814<br>(0.02489)<br>[-0.03026, 0.04767]   |
| factor(year)2017          | -0.01279<br>(0.03109)<br>[-0.06981, 0.04422]  |
| factor(year)2018          | -0.00775<br>(0.04286)<br>[-0.08641, 0.07091]  |
| factor(year)2019          | -0.05880<br>(0.05233)<br>[-0.15362, 0.03602]  |
| Num.Obs.                  | 609                                           |
| R2                        | 0.890                                         |
| R2 Adj.                   | 0.846                                         |
| AIC                       | -1322.7                                       |
| BIC                       | -550.7                                        |
| Log.Lik.                  | 836.361                                       |
| CCG Fixed Effects         | Yes                                           |
| Time Fixed Effects        | Yes                                           |
| Clustered Standard Errors | Yes                                           |

+ p < 0.1, \* p < 0.05, \*\* p < 0.01, \*\*\* p < 0.001

Outsourcing, LA Spend, and CCG Spend have a one year lag.

Tr. Mortality, Population and GDHI are log transformed, 'Ln' denotes the natural log of outcome variable.

For full model expressions see supplementary material (sX)

Robust SEs are clustered at individual level and use a bias-reduced linearization estimator (CR2)

### S.6. Nonparametric Covariate Balancing using Propensity Scores

In our main results we present two models (models 3 and 4) which include covariate balancing using propensity scores. The idea of these models is to balance the sample based on key variables – as would be done were analysis to be done on a treatment and control group – but with a continuous ‘treatment’ of for-profit outsourcing.

We conduct analyses using the CBPS package in R. Covariate balancing is an advanced matching method which can weight values to balance the model, accounting for differences in observations according to their value of a continuous treatment variable, in this case for-profit outsourcing.

We balance our sample firstly on the number of doctors in any given CCG and secondly on the treatable mortality rate at the beginning of our time series in 2013. Below we present the balance plots of how the weights are applied by the propensity scores. ‘Treat’ refers to the ‘treatment’ of for-profit outsourcing (%).

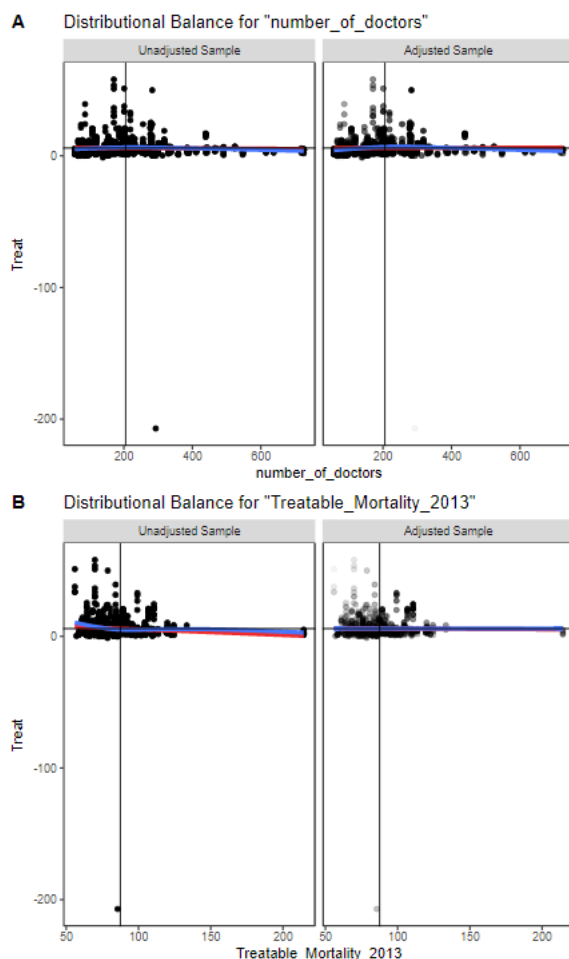

## S.7. Regression on absolute numbers of deaths

We are interested in finding out how many additional deaths can be attributed to changes in outsourcing. To do this we need to run models on the number of treatable deaths - as opposed to the age-standardised rate per 100,000 population. In these models we control for age (% aged over 70) as the dependent variable is no longer age-standardised – and treatable deaths are only counted for people aged 0-74.

For calculating our additional deaths, we need to work out annual additional deaths attributable to for-profit outsourcing. When creating about cumulative changes, calculating additional total spend is more meaningful than the cumulative additional % of spend so we run a model with total spend on absolute deaths.

In the table below model 1 shows our full model regression for-profit outsourcing against number of deaths. Model 2 presents the same model but changing the independent variable of interest to absolute expenditure on for profit companies. Model 2 will have some additional variation in the expenditure variable because we have two partial years of data. This means the change from 2013 to 2014 is not accurate. Consequently, in model 3 we drop our expenditure data years of 2013 and 2020 for which we have partial observations. The coefficient and confidence intervals in model 3 is what we use to create figure 2 in the paper.

|                            | Treatable Deaths (n)                     |                                         |                                         |
|----------------------------|------------------------------------------|-----------------------------------------|-----------------------------------------|
|                            | (1)                                      | (2)                                     | (3)                                     |
| For-profit Outsourcing (%) | 0.5689**<br>(0.1375)<br>[0.1486, 0.9892] |                                         |                                         |
| Private sector spend (£ms) |                                          | 0.2886*<br>(0.1002)<br>[0.0635, 0.5138] | 0.2910*<br>(0.1066)<br>[0.0513, 0.5306] |
| Num.Obs.                   | 609                                      | 609                                     | 519                                     |
| R2                         | 0.049                                    | 0.047                                   | 0.032                                   |
| R2 Adj.                    | -0.332                                   | -0.335                                  | -0.441                                  |
| CCG Fixed Effects          | Yes                                      | Yes                                     | Yes                                     |
| Time Fixed Effects         | Yes                                      | Yes                                     | Yes                                     |
| Clustered Standard Errors  | Yes                                      | Yes                                     | Yes                                     |
| Control variables          | Yes                                      | Yes                                     | Yes                                     |

+ p < 0.1, \* p < 0.05, \*\* p < 0.01, \*\*\* p < 0.001  
 Outsourcing/Spend, LA Spend, and CCG Spend have a one year lag.  
 Population and GDHI are log transformed  
 Robust SEs are clustered at individual level and use a bias-reduced linearization estimator (CR2)

### S.8 Additional deaths plot

In the paper we present figure 2 which is plots the additional deaths attributed to for-profit outsourcing. In the main paper we crop this to 2018 to keep as many CCGs included as possible. We do have data to extent this to 2019 but we lose observations because the mortality data is only available for CCGs which existed after the significant mergers in April 2020. We cannot extend it to 2020 because we only have partial expenditure data for 2020, so additional rates of for-profit expenditure are all negative superficially. Below we present the figure up to 2019 with the 51 CCGs which we have consistent data for. We see that treatable mortality declined severely in 2019. 2020 data appears to show a rise back to 2018 levels so this may not be a sustained improvement (COVID-19 itself is not considered a ‘treatable’ cause of death but undoubtedly had a huge effect on health service performance).

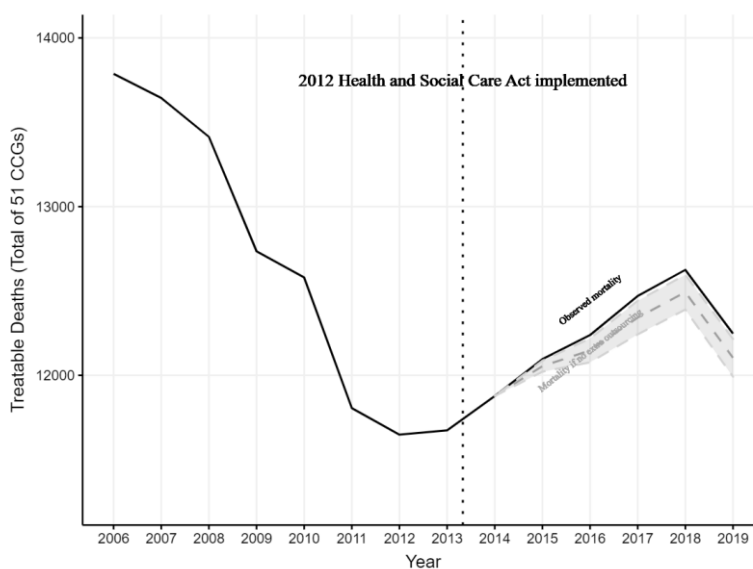

## Sensitivity Checks

### S.9. Falsification test

To ensure that our findings are not measuring some overall population health, rather than healthcare quality, we run our regressions with the outcome variable of preventable mortality – deaths from causes that are possible to be avoided through public health intervention. We find no statistically significant results and can be more confident our main finding represents changes to some form of healthcare quality rather than an association with societal breakdown.

|                                        | ln(P. Mortality)                         |                                          |                                          |                                          |                                              |
|----------------------------------------|------------------------------------------|------------------------------------------|------------------------------------------|------------------------------------------|----------------------------------------------|
|                                        | FE                                       | FD                                       | CBPS (1)                                 | CBPS (2)                                 | MLM                                          |
| For-profit Outsourcing (%)             | 0.0013<br>(0.0008)<br>[-0.0006, 0.0031]  | 0.0021+<br>(0.0015)<br>[-0.0002, 0.0045] | 0.0009<br>(0.0008)<br>[-0.0010, 0.0028]  | 0.0009<br>(0.0008)<br>[-0.0011, 0.0028]  | 0.0017<br>(0.0013)<br>[-0.0009, 0.0043]      |
| LA Spend (£000s per person)            | 0.0214<br>(0.0282)<br>[-0.0248, 0.0676]  | 0.0344<br>(0.0151)<br>[-0.0149, 0.0837]  | -0.0222<br>(0.0369)<br>[-0.1024, 0.0579] | -0.0127<br>(0.0380)<br>[-0.0928, 0.0675] | 0.0340+<br>(0.0184)<br>[-0.0020, 0.0700]     |
| Total CCG Spend (£Ms)                  | 0.0006<br>(0.0004)<br>[-0.0003, 0.0015]  | 0.0013*<br>(0.0004)<br>[0.0002, 0.0024]  | -0.0002<br>(0.0004)<br>[-0.0013, 0.0008] | 0.0001<br>(0.0004)<br>[-0.0009, 0.0011]  | -0.0001<br>(0.0001)<br>[-0.0003, 0.0002]     |
| Claimant Rate (%)                      | 0.0057<br>(0.0093)<br>[-0.0178, 0.0292]  | 0.0084<br>(0.0117)<br>[-0.0126, 0.0294]  | 0.0076<br>(0.0107)<br>[-0.0173, 0.0325]  | 0.0042<br>(0.0104)<br>[-0.0204, 0.0288]  | 0.1309***<br>(0.0109)<br>[0.1095, 0.1523]    |
| Population size                        | -0.0097<br>(0.5388)<br>[-0.9010, 0.8817] | 0.0970<br>(0.6812)<br>[-1.4811, 1.6750]  | 0.1212<br>(0.5279)<br>[-0.8237, 1.0660]  | -0.0110<br>(0.5179)<br>[-0.9393, 0.9172] | 0.0000<br>(0.0190)<br>[-0.0372, 0.0373]      |
| Unemployment Rate (%)                  | -0.0009<br>(0.0028)<br>[-0.0058, 0.0040] | -0.0004<br>(0.0026)<br>[-0.0054, 0.0047] | -0.0013<br>(0.0027)<br>[-0.0065, 0.0038] | -0.0015<br>(0.0027)<br>[-0.0066, 0.0036] | 0.0007<br>(0.0033)<br>[-0.0058, 0.0071]      |
| Ethnic Minority (%)                    | -0.0017<br>(0.0018)<br>[-0.0052, 0.0019] | -0.0026<br>(0.0022)<br>[-0.0063, 0.0011] | -0.0018<br>(0.0020)<br>[-0.0056, 0.0019] | -0.0021<br>(0.0019)<br>[-0.0058, 0.0016] | 0.0040***<br>(0.0009)<br>[0.0022, 0.0057]    |
| Degree Education (%)                   | -0.0002<br>(0.0013)<br>[-0.0027, 0.0023] | -0.0008<br>(0.0014)<br>[-0.0037, 0.0020] | 0.0002<br>(0.0013)<br>[-0.0025, 0.0030]  | 0.0005<br>(0.0012)<br>[-0.0021, 0.0031]  | 0.0004<br>(0.0010)<br>[-0.0016, 0.0023]      |
| Average Disposable H.hold Income       | -0.1101<br>(0.2725)<br>[-0.5657, 0.3456] | -0.0294<br>(0.2379)<br>[-0.4031, 0.3442] | 0.2336<br>(0.3660)<br>[-0.2983, 0.7655]  | 0.0918<br>(0.3561)<br>[-0.4330, 0.6167]  | -0.5838***<br>(0.0486)<br>[-0.6791, -0.4885] |
| Managerial/Professional occupation (%) | -0.0007<br>(0.0020)<br>[-0.0034, 0.0021] | -0.0022<br>(0.0015)<br>[-0.0051, 0.0007] | 0.0010<br>(0.0018)<br>[-0.0020, 0.0041]  | 0.0004<br>(0.0018)<br>[-0.0025, 0.0034]  | -0.0026*<br>(0.0012)<br>[-0.0049, -0.0002]   |
| SD (Observations)                      |                                          |                                          |                                          |                                          | 0.2924                                       |
| Num.Obs.                               | 609                                      | 450                                      | 517                                      | 553                                      | 534                                          |
| R2                                     | 0.014                                    | 0.037                                    | 0.953                                    | 0.951                                    |                                              |
| R2 Adj.                                | -0.378                                   | 0.015                                    | 0.935                                    | 0.932                                    |                                              |
| R2 Marg.                               |                                          |                                          |                                          |                                          | 0.766                                        |
| R2 Cond.                               |                                          |                                          |                                          |                                          | 0.853                                        |
| AIC                                    |                                          |                                          | -1328.3                                  | -1413.3                                  | -881.7                                       |
| BIC                                    |                                          |                                          | -699.6                                   | -735.8                                   | -813.2                                       |
| ICC                                    |                                          |                                          |                                          |                                          | 0.4                                          |
| Log.Lik.                               |                                          |                                          | 812.151                                  | 863.633                                  |                                              |
| RMSE                                   |                                          |                                          |                                          |                                          | 0.08                                         |
| CCG Fixed Effects                      | Yes                                      | Yes                                      | Yes                                      | Yes                                      | No                                           |
| Time Fixed Effects                     | Yes                                      | Yes                                      | Yes                                      | Yes                                      | Yes                                          |
| Clustered Standard Errors              | Yes                                      | Yes                                      | Yes                                      | Yes                                      | Yes                                          |

+ p < 0.1, \* p < 0.05, \*\* p < 0.01, \*\*\* p < 0.001

Outsourcing, LA Spend, and CCG Spend have a one year lag.

P. Mortality, Population and GDHI are log transformed, 'Ln' denotes the natural log of outcome variable.

Robust SEs are clustered at individual level and use a bias-reduced linearization estimator (CR2)

Satterthwaite degrees of freedom used in MLM

## S.10. Dropping individual CCGs

### S.10.1 Plotting results

To ensure that our overall finding isn't driven by a single CCG we sequentially drop each CCG from our model. We find that removing any single CCG only changes the coefficient minimally and the results are always statistically significant.

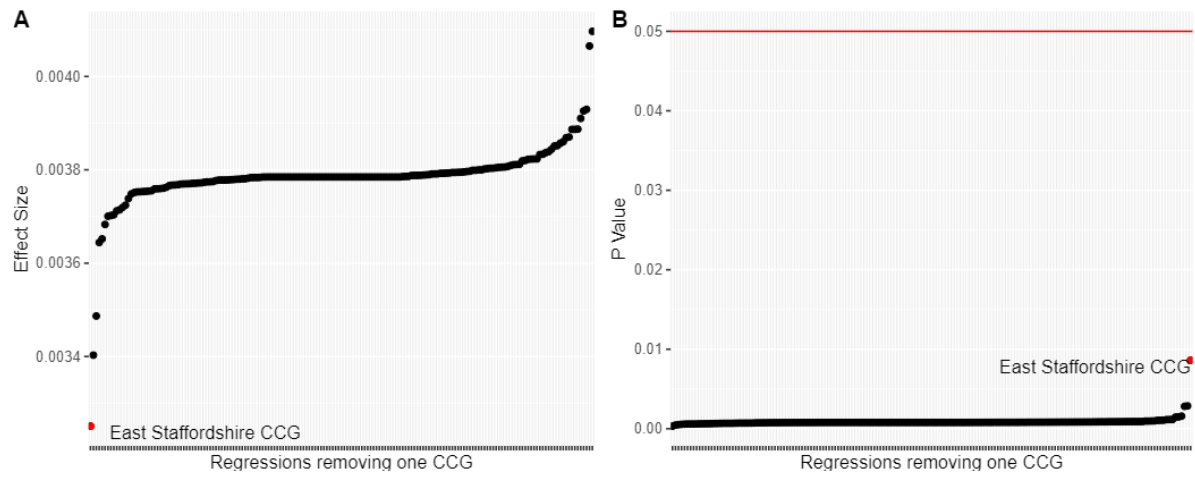

### S.10.2. Full Model removing East Staffordshire

To ensure that our model is completely robust, we removed East Staffordshire giving us the lowest possible coefficient and highest possible p-value, then ran our models with robust standard errors to make entirely sure that our findings hold given any missing CCG.

|                                        | ln(Tr. Mortality)                        |                                          |                                          |                                          |
|----------------------------------------|------------------------------------------|------------------------------------------|------------------------------------------|------------------------------------------|
|                                        | FE                                       | FD                                       | CBPS (1)                                 | CBPS (2)                                 |
| For-profit Outsourcing (%)             | 0.0033**<br>(0.0008)<br>[0.0009, 0.0057] | 0.0045**<br>(0.0014)<br>[0.0016, 0.0074] | 0.0043*<br>(0.0018)<br>[0.0001, 0.0086]  | 0.0034**<br>(0.0009)<br>[0.0008, 0.0059] |
| LA Spend (£000s per person)            | 0.0028<br>(0.0203)<br>[-0.0526, 0.0582]  | -0.0023<br>(0.0191)<br>[-0.0601, 0.0555] | 0.0002<br>(0.0725)<br>[-0.1037, 0.1042]  | -0.0064<br>(0.0617)<br>[-0.1010, 0.0883] |
| Total CCG Spend (£Ms)                  | 0.0004<br>(0.0007)<br>[-0.0007, 0.0014]  | 0.0008<br>(0.0008)<br>[-0.0005, 0.0020]  | 0.0013<br>(0.0008)<br>[-0.0003, 0.0028]  | 0.0000<br>(0.0006)<br>[-0.0012, 0.0011]  |
| Claimant Rate (%)                      | 0.0133<br>(0.0165)<br>[-0.0149, 0.0415]  | 0.0009<br>(0.0149)<br>[-0.0237, 0.0254]  | 0.0310<br>(0.0204)<br>[-0.0095, 0.0715]  | 0.0098<br>(0.0171)<br>[-0.0192, 0.0389]  |
| Population size                        | 0.4770<br>(0.6720)<br>[-0.5927, 1.5467]  | 0.8071<br>(0.8091)<br>[-1.0417, 2.6560]  | 0.2513<br>(0.8628)<br>[-1.1763, 1.6790]  | 0.7247<br>(0.5539)<br>[-0.3728, 1.8222]  |
| Unemployment Rate (%)                  | 0.0023<br>(0.0030)<br>[-0.0036, 0.0082]  | 0.0044<br>(0.0041)<br>[-0.0015, 0.0104]  | 0.0050<br>(0.0043)<br>[-0.0029, 0.0129]  | 0.0023<br>(0.0032)<br>[-0.0038, 0.0083]  |
| Ethnic Minority (%)                    | 0.0023<br>(0.0024)<br>[-0.0020, 0.0066]  | 0.0039+<br>(0.0017)<br>[-0.0005, 0.0083] | 0.0036<br>(0.0027)<br>[-0.0022, 0.0094]  | 0.0016<br>(0.0021)<br>[-0.0028, 0.0060]  |
| Degree Education (%)                   | -0.0008<br>(0.0015)<br>[-0.0038, 0.0022] | -0.0015<br>(0.0012)<br>[-0.0048, 0.0019] | -0.0017<br>(0.0022)<br>[-0.0063, 0.0029] | -0.0003<br>(0.0015)<br>[-0.0034, 0.0028] |
| Average Disposable H.hold Income       | -0.1619<br>(0.2640)<br>[-0.7084, 0.3847] | 0.3290<br>(0.1704)<br>[-0.1104, 0.7684]  | -0.4489<br>(0.4015)<br>[-1.2787, 0.3810] | -0.1097<br>(0.2785)<br>[-0.7299, 0.5105] |
| Managerial/Professional occupation (%) | -0.0022<br>(0.0018)<br>[-0.0055, 0.0011] | -0.0018<br>(0.0016)<br>[-0.0052, 0.0017] | -0.0016<br>(0.0024)<br>[-0.0061, 0.0030] | -0.0013<br>(0.0015)<br>[-0.0047, 0.0022] |
| Num.Obs.                               | 604                                      | 446                                      | 370                                      | 548                                      |
| R2                                     | 0.032                                    | 0.047                                    | 0.899                                    | 0.894                                    |
| R2 Adj.                                | -0.354                                   | 0.025                                    | 0.843                                    | 0.852                                    |
| AIC                                    |                                          |                                          | -810.1                                   | -1217.6                                  |
| BIC                                    |                                          |                                          | -289.6                                   | -545.8                                   |
| Log.Lik.                               |                                          |                                          | 538.033                                  | 764.803                                  |
| CCG Fixed Effects                      | Yes                                      | Yes                                      | Yes                                      | Yes                                      |
| Time Fixed Effects                     | Yes                                      | Yes                                      | Yes                                      | Yes                                      |
| Clustered Standard Errors              | Yes                                      | Yes                                      | Yes                                      | Yes                                      |

+ p < 0.1, \* p < 0.05, \*\* p < 0.01, \*\*\* p < 0.001

Outsourcing, LA Spend, and CCG Spend have a one year lag.

Tr. Mortality, Population and GDHI are log transformed, 'Ln' denotes the natural log of outcome variable.

Robust SEs are clustered at individual level and use a bias-reduced linearization estimator (CR2)



### S.11. Specification curve

To ensure that our finding is not driven by the specific choice of covariates we run a specification curve and find that the effect size varies only minimally with any combination of our covariates. All results have a significant P value, smaller than 0.05. The effect-size varies from 0.00387 to 0.00404 in any given specification which is very stable and suggests our findings are by no means determined by the selection of covariates.

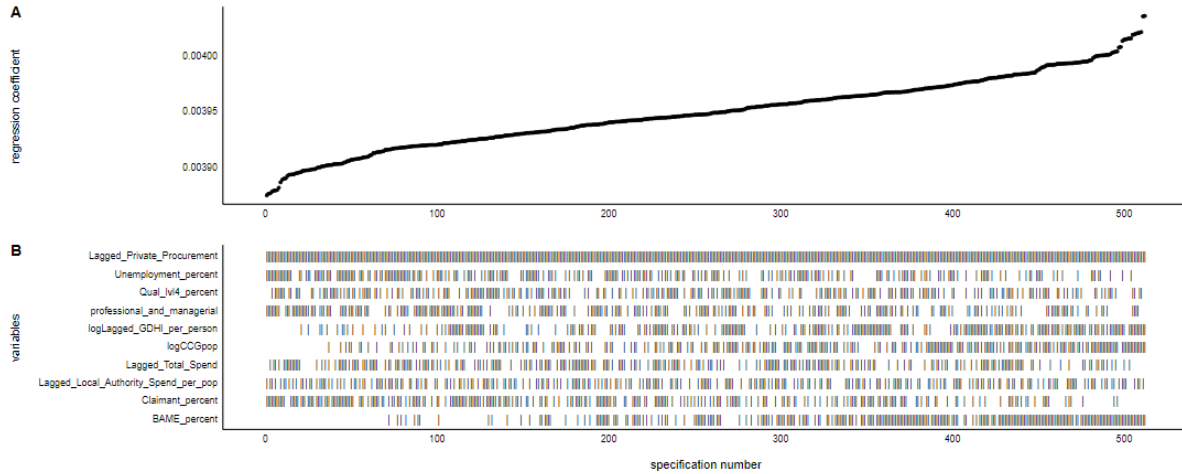

## S.12. Combined Specification curve and random error simulation

### S.12.1. Plotting all specification coefficients together

We combine the specification curve with our random error simulation – looping each specification with varying levels of random error. Here we ran each of the 512 specifications 100 times with 5 different error sizes (20 times with each error size). Below we plot the coefficients and significance levels for each of these regressions.

This analysis shows sensitivity in that it represents how much random error would be needed in our data for our results not to hold – or – how much random error could be in our data in which it still holds. The model used is the same two way FE model which does not account for spatial effects.

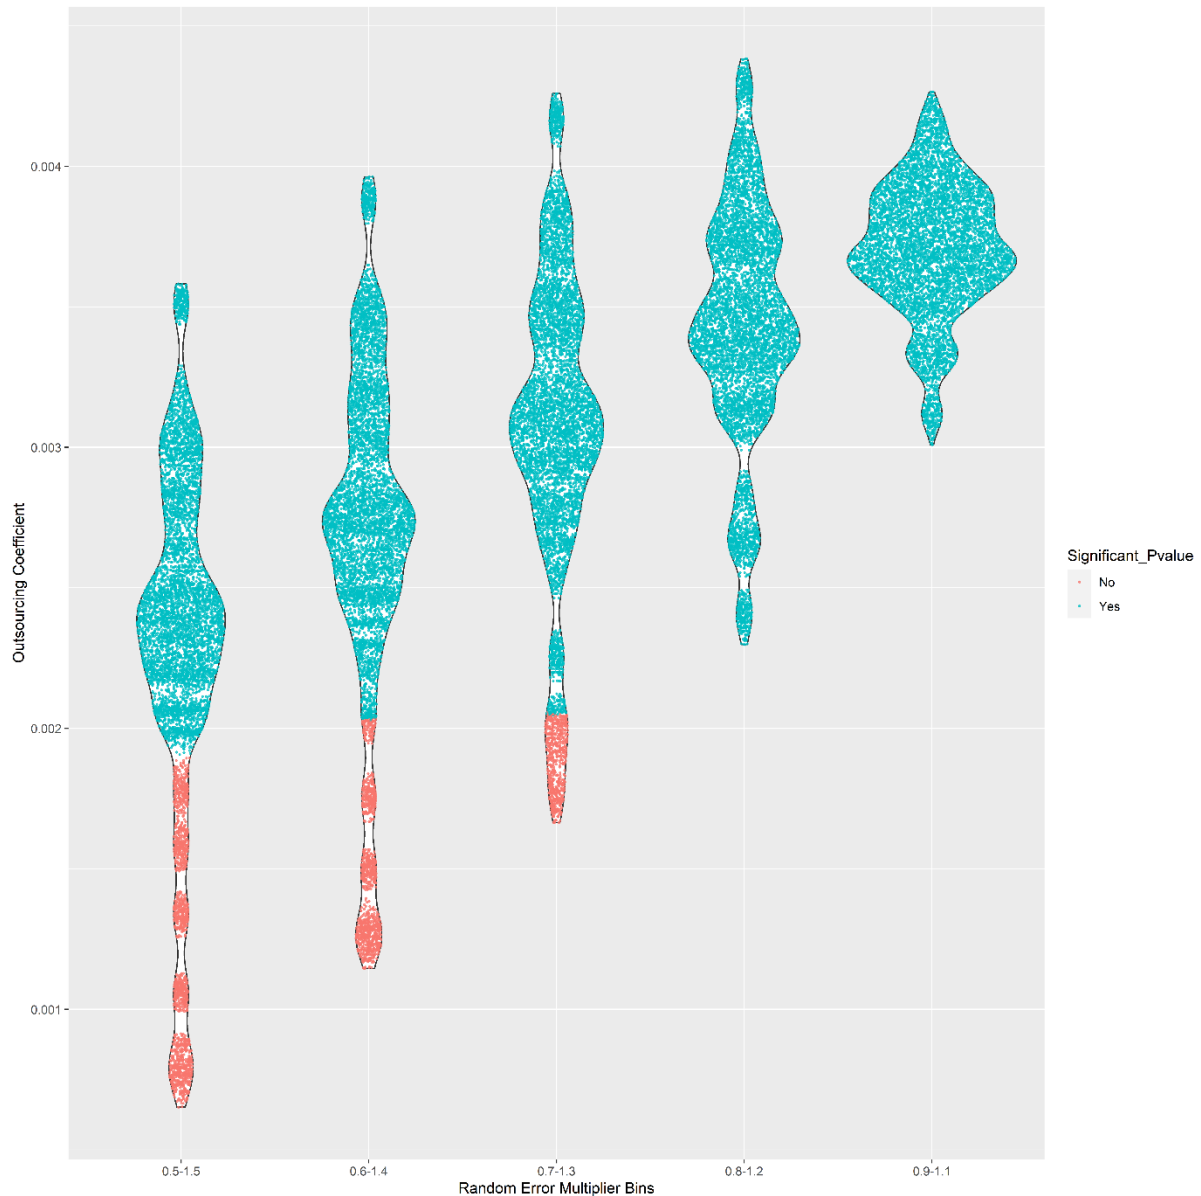

### S.12.2. Selected specifications

If we separate the random error loops for each specification, we can see that given any single specification, the random error creates very similar results. Below we select 17 representatively from the whole sample of specifications, based on average coefficient sizes.

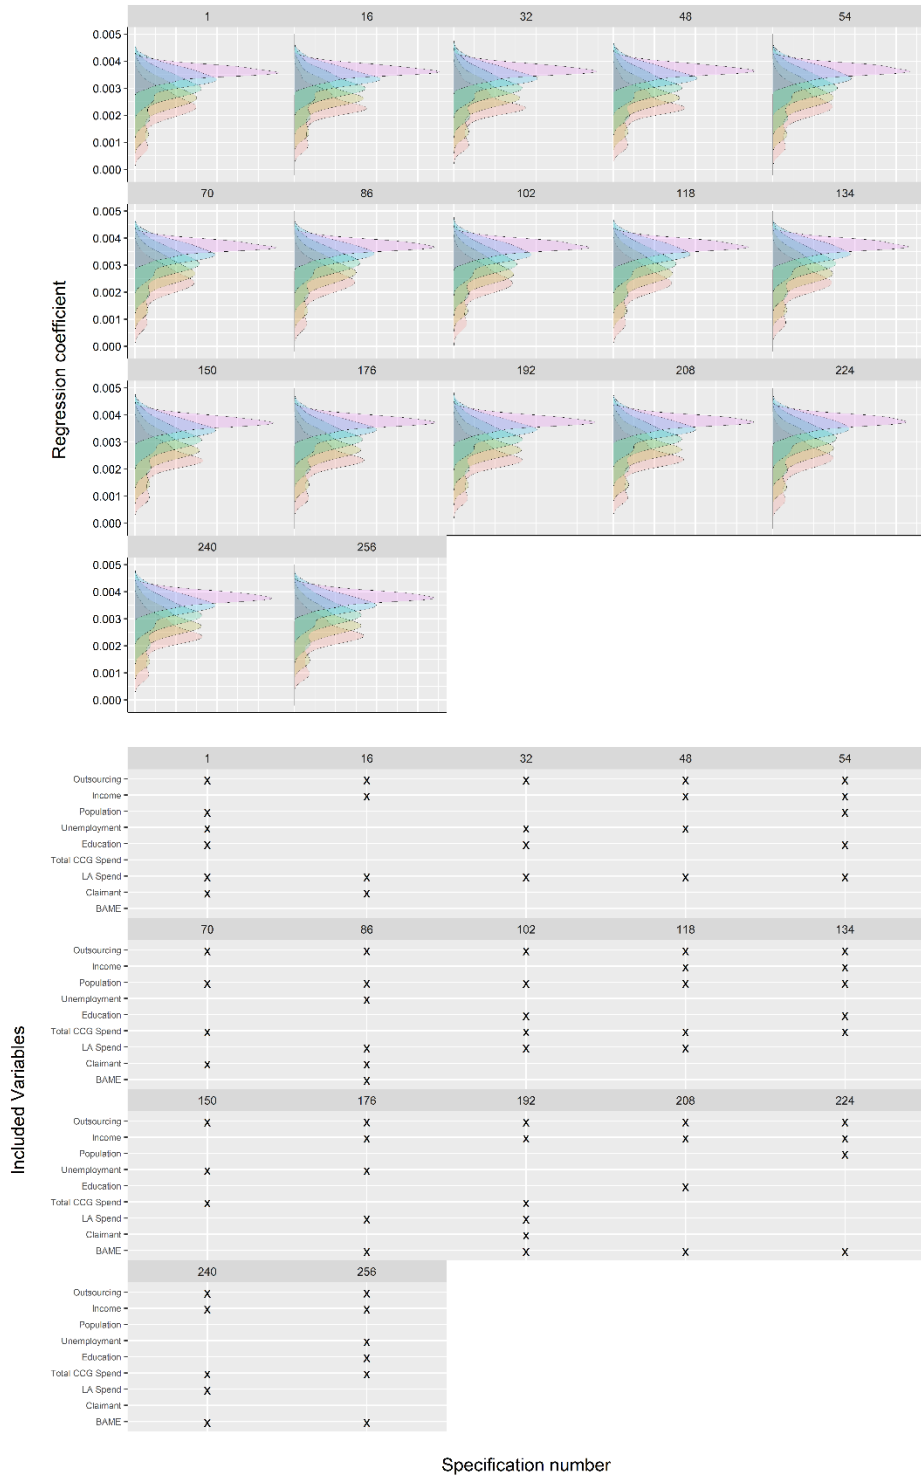

### S.13. Matching

In our main results we report outcomes from covariate balancing using nonparametric methods with propensity scores. This is the best method for our data because we have a continuous ‘treatment’ variable – outsourcing %. We can also wrangle outsourcing to be a binary treatment – CCGs either experience a high level of outsourcing or a low level of outsourcing – ie. they are grouped into a treatment group if they experience some level of outsourcing, or a control group if they do not. In this way we can weight observations based on full matches on the number of GPs and Treatable Mortality Rates in 2013.

Using this identification, we can run more traditional, full matching models. The models have a very similar effect size to our npCBPS. In the table below, models 1-3 are matching on the number of GPs and models 4-6 are matching on levels of Treatable Mortality in 2013. Models 1 and 4 treat 4% of for-profit outsourcing as the treatment benchmark, models 2 and 5 use 7% and models 3 and 6 use 10%.

|                            | <b>ln(T. Mortality)</b> |                  |                  |                  |                  |                  |
|----------------------------|-------------------------|------------------|------------------|------------------|------------------|------------------|
|                            | <b>(1)</b>              | <b>(2)</b>       | <b>(3)</b>       | <b>(4)</b>       | <b>(5)</b>       | <b>(6)</b>       |
| For-profit Outsourcing (%) | 0.0037***               | 0.0035***        | 0.0038***        | 0.0033**         | 0.0040***        | 0.0035**         |
|                            | (0.0008)                | (0.0008)         | (0.0009)         | (0.0010)         | (0.0010)         | (0.0010)         |
|                            | [0.0017, 0.0057]        | [0.0016, 0.0054] | [0.0018, 0.0057] | [0.0010, 0.0056] | [0.0022, 0.0059] | [0.0013, 0.0056] |
| Num.Obs.                   | 571                     | 571              | 571              | 571              | 571              | 571              |
| R2                         | 0.912                   | 0.930            | 0.913            | 0.893            | 0.926            | 0.910            |
| R2 Adj.                    | 0.877                   | 0.903            | 0.879            | 0.851            | 0.897            | 0.874            |
| AIC                        | -1213.1                 | -1097.6          | -1196.5          | -839.0           | -974.9           | -839.6           |
| BIC                        | -500.2                  | -384.7           | -483.5           | -126.0           | -261.9           | -126.6           |
| Log.Lik.                   | 770.575                 | 712.813          | 762.225          | 583.496          | 651.438          | 583.786          |
| CCG Fixed Effects          | Yes                     | Yes              | Yes              | Yes              | Yes              | Yes              |
| Time Fixed Effects         | Yes                     | Yes              | Yes              | Yes              | Yes              | Yes              |
| Clustered Standard Errors  | Yes                     | Yes              | Yes              | Yes              | Yes              | Yes              |
| Control Variables          | Yes                     | Yes              | Yes              | Yes              | Yes              | Yes              |

+ p < 0.1, \* p < 0.05, \*\* p < 0.01, \*\*\* p < 0.001

Outsourcing, LA Spend, and CCG Spend have a one year lag.

Tr. mortality, Population and GDHI are log transformed, ‘Ln’ denotes the natural log of outcome variable.

Robust SEs are clustered at individual level and use a bias-reduced linearization estimator (CR2)

## Additional Analyses

### S.14. Quadratic term

To test whether our result has a non-linear relationship. We find no significant result with our polynomial variable.

|                            | ln(T. Mortality)<br>(1)                 |
|----------------------------|-----------------------------------------|
| For-profit Outsourcing (%) | 0.0029<br>(0.0021)<br>[-0.0012, 0.0071] |
| Quadratic Outsourcing Term | 0.0000<br>(0.0000)<br>[-0.0001, 0.0001] |
| Num.Obs.                   | 609                                     |
| R2                         | 0.890                                   |
| R2 Adj.                    | 0.846                                   |
| AIC                        | -1321.1                                 |
| BIC                        | -544.6                                  |
| Log.Lik.                   | 836.535                                 |
| CCG Fixed Effects          | Yes                                     |
| Time Fixed Effects         | Yes                                     |
| Clustered Standard Errors  | Yes                                     |
| Control Variables          | Yes                                     |

+ p < 0.1, \* p < 0.05, \*\* p < 0.01, \*\*\* p < 0.001  
 Outsourcing, LA Spend, and CCG Spend have a one year lag.  
 Tr. mortality, Population and GDHI are log transformed, 'Ln' denotes the natural log of outcome variable.  
 Robust SEs are clustered at individual level and use a bias-reduced linearization estimator (CR2)

### S.14. Growth curve models

#### S.14.1 Unconditional growth model

We are interested to see if Outsourcing increased statistically significantly over this period. We find that, as per our descriptive analysis, for-profit outsourcing has indeed increased between 2013 and 2020.

|                           | For-profit Outsourcing (%)<br>(1)       |
|---------------------------|-----------------------------------------|
| Time                      | 0.2321*<br>(0.1166)<br>[0.0034, 0.4607] |
| Num.Obs.                  | 944                                     |
| R2 Marg.                  | 0.005                                   |
| R2 Cond.                  |                                         |
| AIC                       | 6750.8                                  |
| BIC                       | 6779.9                                  |
| RMSE                      | 6.98                                    |
| Clustered Standard Errors | Yes                                     |

+ p < 0.1, \* p < 0.05, \*\* p < 0.01, \*\*\* p < 0.001  
 Tr. mortality is log transformed, 'Ln' denotes the natural log of outcome variable.  
 Robust SEs are clustered at individual level and use a bias-reduced linearization estimator (CR2)

### S.14.2 Conditional growth model

We are also interested if the absolute levels of outsourcing explain changes in mortality rates over this period. We find that levels of outsourcing do not explain changes in mortality.

|                            | ln(T. Mortality)<br>(1)                     |
|----------------------------|---------------------------------------------|
| For-profit Outsourcing (%) | 0.3984<br>(0.4419)<br>[-0.4678, 1.2645]     |
| Time                       | -0.0055**<br>(0.0019)<br>[-0.0093, -0.0017] |
| Interaction term           | -0.0002<br>(0.0002)<br>[-0.0006, 0.0002]    |
| <hr/>                      |                                             |
| Num.Obs.                   | 785                                         |
| R2 Marg.                   | 0.005                                       |
| R2 Cond.                   | 0.834                                       |
| AIC                        | -1239.0                                     |
| BIC                        | -1201.7                                     |
| ICC                        | 0.8                                         |
| RMSE                       | 0.07                                        |
| Clustered Standard Errors  | Yes                                         |
| Control Variables          | Yes                                         |

+ p < 0.1, \* p < 0.05, \*\* p < 0.01, \*\*\* p < 0.001

Tr. mortality is log transformed, 'Ln' denotes the natural log of outcome variable.

Robust SEs are clustered at individual level and use a bias-reduced linearization estimator (CR2)

### S.15 Difference in Difference

Levels of outsourcing are not a binary treatment and almost all CCGs saw an increase in outsourcing between 2013 and 2020. There are only five CCGs which report no increases in outsourcing, but have at least four years of spending reported (three observations of spending change). As such, it is not possible to conduct a rigorous difference in differences analysis.

However below we run a DiD to see whether the coefficient is somewhat comparable to the main findings. We consider that CCGs which did not increase their outsourcing in any given year, but reported at least four years of data, are a control group and all other CCGs which report at least three years of data are a treatment group. We then look at treatable mortality rates before and after 2014 to compare whether the 'treatment' of increased outsourcing is associated with worse changes in mortality rates.

We find a positive statistically insignificant difference in difference between the CCGs which increased outsourcing in at least one year and those which had no increases in outsourcing at all.

### S.15.1 DiD Table

| <b>In(T. Mortality)</b>                           |                                          |
|---------------------------------------------------|------------------------------------------|
| <b>(1)</b>                                        |                                          |
| Treatment                                         | 0.1311**<br>(0.0407)<br>[0.0513, 0.2110] |
| Time                                              | -0.0723<br>(0.0530)<br>[-0.1761, 0.0316] |
| Treatment*Time                                    | 0.0149<br>(0.0541)<br>[-0.0913, 0.1211]  |
| <hr/>                                             |                                          |
| Num.Obs.                                          | 1092                                     |
| R2                                                | 0.048                                    |
| R2 Adj.                                           | 0.045                                    |
| AIC                                               | -664.2                                   |
| BIC                                               | -639.2                                   |
| F                                                 | 18.311                                   |
| RMSE                                              | 0.18                                     |
| + p < 0.1, * p < 0.05, ** p < 0.01, *** p < 0.001 |                                          |

### S.15.2 DiD graph

We visualise this relationship below.

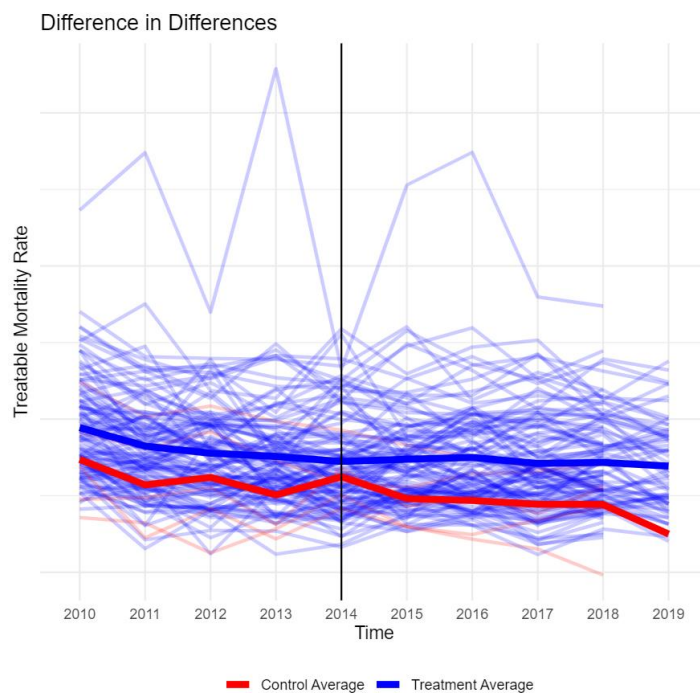

## S.16. Interactions terms

We are interested in how the relationship between outsourcing and treatable mortality differs according to changes in austerity and population demographics. Perhaps the increase in mortality, given an increase in outsourcing is greater when the population is becoming poorer or total CCG expenditure is declining.

### S.16.1 Interaction with austerity

We find no statistically significant interaction effect when testing whether changes to total CCG spend or LA spend alters the relationship between outsourcing and treatable mortality.

|                             | ln(T. Mortality)                         |                                         |
|-----------------------------|------------------------------------------|-----------------------------------------|
|                             | (1)                                      | (2)                                     |
| For-profit Outsourcing (%)  | 0.0033**<br>(0.0007)<br>[0.0010, 0.0056] | 0.0035*<br>(0.0010)<br>[0.0007, 0.0063] |
| Total CCG Spend (£Ms)       | 0.0000<br>(0.0007)<br>[-0.0013, 0.0013]  |                                         |
| Outsourcing*CCG Spend       | 0.0000<br>(0.0001)<br>[-0.0001, 0.0002]  |                                         |
| LA spend (£000s per person) |                                          | 0.0029<br>(0.0250)<br>[-0.0555, 0.0613] |
| Outsourcing*LA Spend        |                                          | 0.0000<br>(0.0008)<br>[-0.0021, 0.0022] |
| Num.Obs.                    | 648                                      | 648                                     |
| R2                          | 0.886                                    | 0.886                                   |
| R2 Adj.                     | 0.846                                    | 0.846                                   |
| AIC                         | -1429.3                                  | -1428.8                                 |
| BIC                         | -668.7                                   | -668.3                                  |
| RMSE                        | 0.06                                     | 0.06                                    |
| CCG Fixed Effects           | Yes                                      | Yes                                     |
| Time Fixed Effects          | Yes                                      | Yes                                     |
| Clustered Standard Errors   | Yes                                      | Yes                                     |

+ p < 0.1, \* p < 0.05, \*\* p < 0.01, \*\*\* p < 0.001

Outsourcing, LA Spend, and CCG Spend have a one year lag.

Tr. mortality, Population and GDHI are log transformed, 'Ln' denotes the natural log of outcome variable.

Robust SEs are clustered at individual level and use a bias-reduced linearization estimator (CR2)



## S.16.2 Interaction with demographics

We also find no statistically significant interaction effect for any our demographic variables.

|                                        | ln(T. Mortality)                          |                                         |                                          |                                         |                                         |                                          |                                          |
|----------------------------------------|-------------------------------------------|-----------------------------------------|------------------------------------------|-----------------------------------------|-----------------------------------------|------------------------------------------|------------------------------------------|
|                                        | (1)                                       | (2)                                     | (3)                                      | (4)                                     | (5)                                     | (6)                                      | (7)                                      |
| For-profit Outsourcing (%)             | -0.0647<br>(0.0474)<br>[-0.1533, 0.0239]  | 0.0168<br>(0.0260)<br>[-0.0502, 0.0838] | -0.0021<br>(0.0046)<br>[-0.0124, 0.0082] | 0.0035*<br>(0.0011)<br>[0.0008, 0.0062] | 0.0040*<br>(0.0016)<br>[0.0003, 0.0078] | 0.0040+<br>(0.0018)<br>[-0.0003, 0.0082] | -0.0019<br>(0.0042)<br>[-0.0114, 0.0075] |
| Average Disposable H.hold Income       | -0.1505<br>(0.2416)<br>[-0.6624, 0.3614]  |                                         |                                          |                                         |                                         |                                          |                                          |
| Outsourcing*Income                     | 0.0068<br>(0.0048)<br>[-0.0020, 0.0157]   |                                         |                                          |                                         |                                         |                                          |                                          |
| Population size                        | 0.4897<br>(0.6013)<br>[-0.5815, 1.5610]   |                                         |                                          |                                         |                                         |                                          |                                          |
| Outsourcing*Population                 | -0.0011<br>(0.0021)<br>[-0.0065, 0.0044]  |                                         |                                          |                                         |                                         |                                          |                                          |
| Managerial/Professional occupation (%) | -0.0034*<br>(0.0020)<br>[-0.0068, 0.0000] |                                         |                                          |                                         |                                         |                                          |                                          |
| Outsourcing*Occupation                 | 0.0002<br>(0.0001)<br>[-0.0001, 0.0005]   |                                         |                                          |                                         |                                         |                                          |                                          |
| Ethnic Minority (%)                    | 0.0019<br>(0.0021)<br>[-0.0025, 0.0062]   |                                         |                                          |                                         |                                         |                                          |                                          |
| Outsourcing*Ethnicity                  | 0.0000<br>(0.0001)<br>[-0.0002, 0.0002]   |                                         |                                          |                                         |                                         |                                          |                                          |
| Claimant Rate (%)                      | 0.0145<br>(0.0185)<br>[-0.0170, 0.0460]   |                                         |                                          |                                         |                                         |                                          |                                          |
| Outsourcing*Claimant Rate              | -0.0002<br>(0.0010)<br>[-0.0026, 0.0021]  |                                         |                                          |                                         |                                         |                                          |                                          |
| Unemployment Rate (%)                  | 0.0017<br>(0.0033)<br>[-0.0056, 0.0089]   |                                         |                                          |                                         |                                         |                                          |                                          |
| Outsourcing*Unemployment Rate          | 0.0000<br>(0.0003)<br>[-0.0009, 0.0008]   |                                         |                                          |                                         |                                         |                                          |                                          |
| Degree Education (%)                   | -0.0019<br>(0.0017)<br>[-0.0050, 0.0011]  |                                         |                                          |                                         |                                         |                                          |                                          |
| Outsourcing*Education                  | 0.0001<br>(0.0001)<br>[-0.0001, 0.0004]   |                                         |                                          |                                         |                                         |                                          |                                          |
| Num.Obs.                               | 609                                       | 609                                     | 609                                      | 609                                     | 609                                     | 609                                      | 609                                      |
| R2                                     | 0.889                                     | 0.888                                   | 0.889                                    | 0.889                                   | 0.888                                   | 0.888                                    | 0.889                                    |
| R2 Adj.                                | 0.847                                     | 0.847                                   | 0.848                                    | 0.847                                   | 0.847                                   | 0.846                                    | 0.847                                    |
| AIC                                    | -1331.5                                   | -1329.2                                 | -1333.4                                  | -1329.5                                 | -1329.2                                 | -1328.3                                  | -1331.0                                  |
| BIC                                    | -590.3                                    | -588.0                                  | -592.2                                   | -588.3                                  | -588.0                                  | -587.1                                   | -589.8                                   |
| RMSE                                   | 0.06                                      | 0.06                                    | 0.06                                     | 0.06                                    | 0.06                                    | 0.06                                     | 0.06                                     |
| CCG Fixed Effects                      | Yes                                       | Yes                                     | Yes                                      | Yes                                     | Yes                                     | Yes                                      | Yes                                      |
| Time Fixed Effects                     | Yes                                       | Yes                                     | Yes                                      | Yes                                     | Yes                                     | Yes                                      | Yes                                      |
| Clustered Standard Errors              | Yes                                       | Yes                                     | Yes                                      | Yes                                     | Yes                                     | Yes                                      | Yes                                      |

+ p < 0.1, \* p < 0.05, \*\* p < 0.01, \*\*\* p < 0.001

Outsourcing, LA Spend, and CCG Spend have a one year lag.

Tr. mortality, Population and GDHI are log transformed, 'ln' denotes the natural log of outcome variable.

Robust SEs are clustered at individual level and use a bias-reduced linearization estimator (CR2)

### S.16.3 Interaction between deprived and affluent CCGs

We can also conduct interaction effects with time invariant measure of deprivation in a mixed effects model to understand whether the relationship between outsourcing and treatable mortality differs according to overall level of deprivation. Here we use the Index of Multiple Deprivation 2019, extent of deprivation measure. Again we find no significant interaction.

|                            | ln(T. Mortality)<br>(1)                   |
|----------------------------|-------------------------------------------|
| For-profit Outsourcing (%) | -0.0005<br>(0.0010)<br>[-0.0025, 0.0016]  |
| Deprivation (2019)         | 0.8847***<br>(0.0481)<br>[0.7905, 0.9790] |
| Outsourcing*Deprivation    | 0.0040<br>(0.0052)<br>[-0.0062, 0.0142]   |
| <hr/>                      |                                           |
| Num.Obs.                   | 648                                       |
| R2 Marg.                   | 0.710                                     |
| R2 Cond.                   | 0.847                                     |
| AIC                        | -1239.6                                   |
| BIC                        | -1190.4                                   |
| ICC                        | 0.5                                       |
| RMSE                       | 0.07                                      |
| CCG Random Effects         | Yes                                       |
| Time Fixed Effects         | Yes                                       |
| Clustered Standard Errors  | Yes                                       |

+ p < 0.1, \* p < 0.05, \*\* p < 0.01, \*\*\* p < 0.001

Outsourcing, LA Spend, and CCG Spend have a one year lag.

Tr. mortality, Population and GDHI are log transformed, 'Ln' denotes the natural log of outcome variable.

Robust SEs are clustered at individual level and use a bias-reduced linearization estimator (CR2)

### S.17. Spatial autocorrelation

Our results look at within CCG changes in outsourcing, however, it may be the case that there are clusters of high outsourcing. We assess whether, on overall % of outsourcing 2013-2020, there are clusters of high outsourcing. We present LISA clusters below analysing the spatial autocorrelation between bordering neighbours.

We find two clusters of high outsourcing levels, statistically significant at the 5% level. One region in West of England and Nottingham city. However overall, there is very little spatial autocorrelation in the levels of for-profit outsourcing.

**CCG19NM**

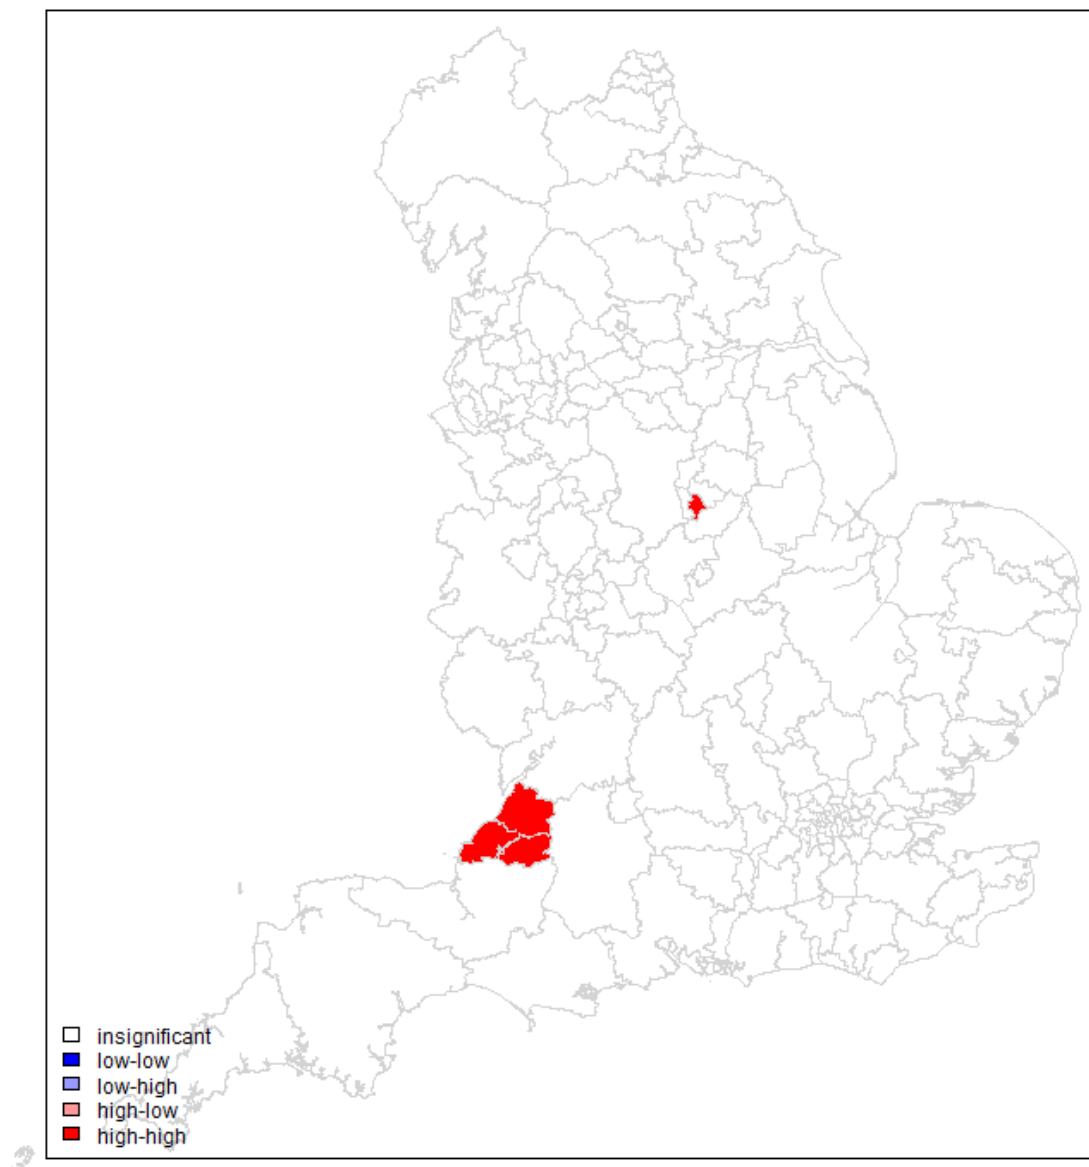

### S.18. Zoomed in maps

In case the map in figure 1 is difficult to see some of the city regions in England, below we present zoomed in maps for a) the North West of England, b) the West Midlands, c) London.

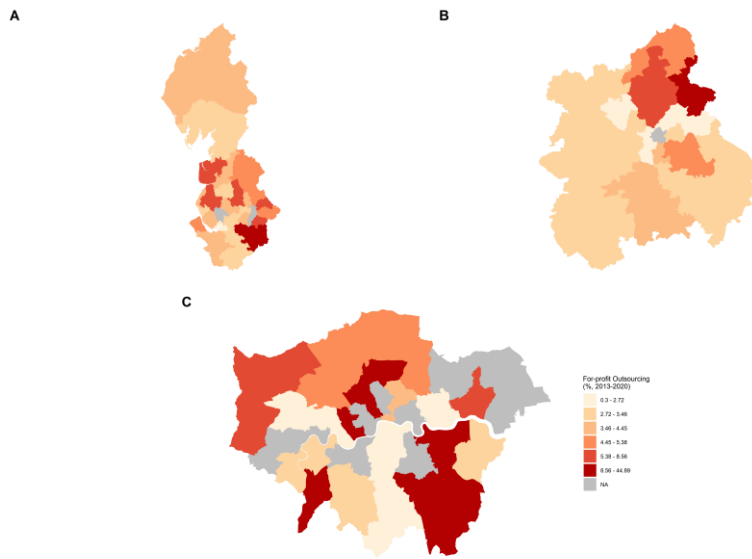

### S.19. Ethnicity breakdown

In the main findings we control for ethnic minority % but there is some available data for further breakdowns in ethnicity. Due to data suppression and small numbers, there is lots of missing data and our observations are reduced by over half. Nonetheless we present these breakdowns below. Our main finding holds in all instances.

|                            | ln(T. Mortality)  |                   |                   |                   |
|----------------------------|-------------------|-------------------|-------------------|-------------------|
|                            | (1)               | (2)               | (3)               | (4)               |
| For-profit Outsourcing (%) | 0.0053*           | 0.0056**          | 0.0054*           | 0.0056**          |
|                            | (0.0020)          | (0.0019)          | (0.0019)          | (0.0019)          |
|                            | [0.0012, 0.0095]  | [0.0015, 0.0097]  | [0.0013, 0.0095]  | [0.0015, 0.0097]  |
| Black/Black British (%)    | 0.0007            |                   |                   |                   |
|                            | (0.0038)          |                   |                   |                   |
|                            | [-0.0077, 0.0090] |                   |                   |                   |
| Mixed ethnicity (%)        |                   | 0.0150+           |                   |                   |
|                            |                   | (0.0075)          |                   |                   |
|                            |                   | [-0.0026, 0.0326] |                   |                   |
| Indian (%)                 |                   |                   | 0.0034            |                   |
|                            |                   |                   | (0.0042)          |                   |
|                            |                   |                   | [-0.0062, 0.0130] |                   |
| Bangladeshi/ Pakistani (%) |                   |                   |                   | -0.0072+          |
|                            |                   |                   |                   | (0.0038)          |
|                            |                   |                   |                   | [-0.0155, 0.0012] |
| Num.Obs.                   | 290               | 290               | 290               | 290               |
| R2                         | 0.922             | 0.923             | 0.922             | 0.923             |
| R2 Adj.                    | 0.885             | 0.886             | 0.885             | 0.886             |
| AIC                        | -669.1            | -673.2            | -669.8            | -673.2            |
| BIC                        | -316.8            | -320.9            | -317.4            | -320.9            |
| RMSE                       | 0.05              | 0.05              | 0.05              | 0.05              |

+ p < 0.1, \* p < 0.05, \*\* p < 0.01, \*\*\* p < 0.001

## Data

### S.20. Data Cleaning

For the statistical analysis in this paper, data is aggregated annually. This means constructing an annual variable of for-profit outsourcing. The data for this variable starts in April 2013 and ends in March 2020. Consequently, we use a % of spend going to for-profit companies rather than an absolute value – which would vary a lot from 2013-2014 and 2019-2020.

When aggregating CCG mortality and population data, we use CCG19CD codes to avoid matching on names. This is important given the many mergers to CCGs taking place in 2020. For non-mortality data used at the CCG scale (income, LA spending, occupation, ethnicity, unemployment rate, claimant rate and education rates) this data is only available at the LA level, consequently we take averages of overlapping LAs for each CCG. An ONS best-fit lookup is used for this purpose.

For the MLM we use LA-level mortality data. LA-level mortality rates are only available as rolling 3-year periods. Consequently, we construct expenditure variables for 3-year periods. For the control variables we calculate a 3-year mean for each LA.

### S.21. Missing Data

There are two limitations from missing data in this paper. The first is the missing data in the expenditure data. There are many instances where CCGs did not report their expenditure on their websites, or the format was not machine readable. While there is a chance that not reporting of data is symbolic of poor-quality healthcare management and therefore not random. However, it seems unlikely that outsourcing and likelihood of reporting data is associated and therefore we would not expect our finding to be impacted by this. We also conduct many sensitivity checks removing or altering the data slightly and always find robust results.

The second issue with missing data was created by the large number of CCG mergers in 2020. Although our expenditure data is not affected by this as it was collected up until this moment, the mortality data for 2019 and 2020, released after the mergers, is not available for CCGs. There is a chance that the mergers happened non-randomly to treatable mortality rates. However the results all hold when only using data before 2019, so we have taken care to account for this bias.

### S.21.1 Missing Data of CCG Expenditure and Mortality

To show the entire extent of the available data, and therefore missing data too, below we plot which years we have data available for in each of the CCGs included in this analysis for the two key variables.

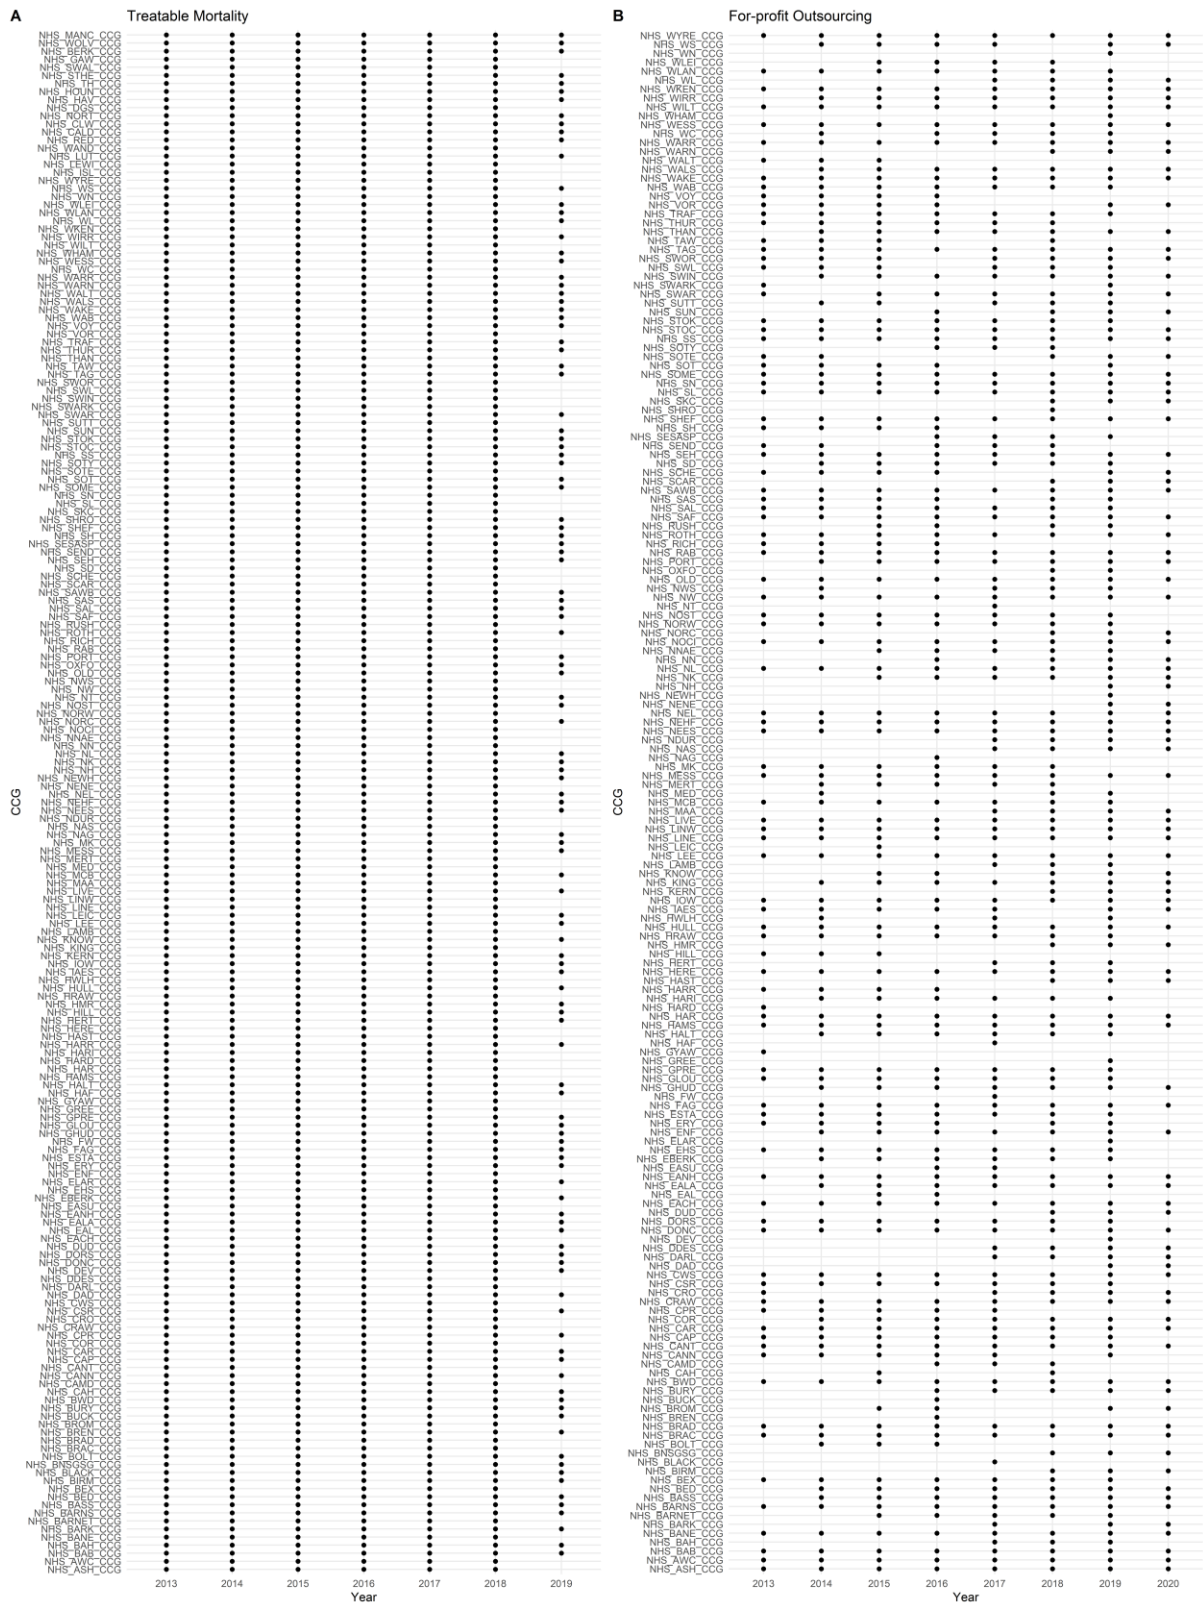

## S.22. Model Data Summary

Below we present summaries of all variables included in all the statistical models. Summaries here are for complete observations included in the analysis.

|                                           | Mean (SD)          | Median (IQR)    | Source                     |
|-------------------------------------------|--------------------|-----------------|----------------------------|
| Treatable Mortality Rate                  | 85.87 (0.62)       | 83.7 (22.25)    | ONS                        |
| For-Profit Outsourcing (%)                | 5.76 (0.38)        | 4.04 (3.41)     | Rahal & Mohan, (2022).[19] |
| Total CCG Spend (£Ms)                     | 24.3 (0.75)        | 19.1 (20.48)    | Rahal & Mohan, (2022).[19] |
| Local Authority Spend (per Capita)        | 1.27 (0.05)        | 1.5 (1.61)      | MHCLG (RSX)                |
| Claimant Rate                             | 2.07 (0.04)        | 1.83 (1.39)     | ONS (Claimant Count)       |
| Population size                           | 285514.3 (6141.27) | 239855 (149055) | ONS                        |
| Unemployment Rate                         | 5.36 (0.08)        | 4.9 (2.6)       | ONS (APS)                  |
| Ethnic Minority (%)                       | 10.31 (0.4)        | 5.8 (10.3)      | ONS (APS)                  |
| Degree Education (%)                      | 35.49 (0.34)       | 34.3 (11.22)    | ONS (APS)                  |
| Average Disposable H.hold Income          | 19952.09 (275.28)  | 18774 (4641)    | ONS (GDHI)                 |
| Managerial or Professional Occupation (%) | 30.34 (0.23)       | 29.8 (8.3)      | ONS (APS)                  |

## S.23. Data Locations

Below we present a table with the full location of data used to create all variables in this analysis. And a brief discussion about the strengths and weaknesses of each.

| Variable                           | Source                                                                                                                                                                                                                                                         | Data Location                                                                                                                                                                                                                                                                                                                                                             | Strengths                                                                                                                                                                                                                                                                                                                    | Weaknesses                                                                                                                                                                                                                                                                                                                                                                                       |
|------------------------------------|----------------------------------------------------------------------------------------------------------------------------------------------------------------------------------------------------------------------------------------------------------------|---------------------------------------------------------------------------------------------------------------------------------------------------------------------------------------------------------------------------------------------------------------------------------------------------------------------------------------------------------------------------|------------------------------------------------------------------------------------------------------------------------------------------------------------------------------------------------------------------------------------------------------------------------------------------------------------------------------|--------------------------------------------------------------------------------------------------------------------------------------------------------------------------------------------------------------------------------------------------------------------------------------------------------------------------------------------------------------------------------------------------|
| Treatable Mortality Rate           | ONS                                                                                                                                                                                                                                                            | <a href="https://www.ons.gov.uk/peoplepopulationandcommunity/healthandsocialcare/causesofdeath/datasets/avoidablemortalitybyclinicalcommissioninggroupsinenglandandhealthboardsinwales">https://www.ons.gov.uk/peoplepopulationandcommunity/healthandsocialcare/causesofdeath/datasets/avoidablemortalitybyclinicalcommissioninggroupsinenglandandhealthboardsinwales</a> | Treatable mortality is a useful measure because it is a measure of health outcome which can a) be measured at a population level and b) only capture outcomes which can be improved by the health system – rather than broader health measures such as life expectancy                                                       | CCG reforms in 2020 meant that 2019 data was reported with new merged CCGs so we lose a few observations in that year. Due to the small numbers we cannot break down treatable mortality into specific causes of death very well. For instance a useful analysis could be to see how outsourcing relates with mortality from medical accidents but this is not possible due to data suppression. |
| For-profit Outsourcing (%)         | Rahal, C., & Mohan, J. (2022, January 27). The Role of the Third Sector in Public Health Service Provision: Evidence from 25,338 heterogeneous procurement datasets. <a href="https://doi.org/10.31235/osf.io/t4x52">https://doi.org/10.31235/osf.io/t4x52</a> | <a href="https://doi.org/10.5281/zenodo.5054679">https://doi.org/10.5281/zenodo.5054679</a>                                                                                                                                                                                                                                                                               | The strengths of this variable are the precision of being able to estimate the exact percent of reported expenditure which goes to for profit companies. Previously, the 'healthcare from non-NHS organisations' category of the CCG accounts would have to be used but the data underlying these numbers was not published. | Lack of reporting by some CCGs means that the data is not complete. Some error may exist in the data from the process of matching supplier names to companies house register. The services for which the payments are made are not reported.                                                                                                                                                     |
| Total CCG Spend (£Ms)              | Rahal, C., & Mohan, J. (2022, January 27). The Role of the Third Sector in Public Health Service Provision: Evidence from 25,338 heterogeneous procurement datasets. <a href="https://doi.org/10.31235/osf.io/t4x52">https://doi.org/10.31235/osf.io/t4x52</a> | <a href="https://doi.org/10.5281/zenodo.5054679">https://doi.org/10.5281/zenodo.5054679</a>                                                                                                                                                                                                                                                                               | A specific measure which legally needs to report all expenditure by CCGs over £25,000. By being able to calculate the total expenditure by a given CCG we can control for any confounding of total healthcare service provided and the percentage of that delivered by the private sector.                                   | Lack of reporting by some CCGs means that the data is not complete.                                                                                                                                                                                                                                                                                                                              |
| Local Authority Spend (per Capita) | MHCLG (RSX)                                                                                                                                                                                                                                                    | <a href="https://www.gov.uk/government/collections/local-authority-revenue-expenditure-and-financing">https://www.gov.uk/government/collections/local-authority-revenue-expenditure-and-financing</a>                                                                                                                                                                     | Total service expenditure includes services such as social care, public health and environmental services. This is complete data at the LA level which                                                                                                                                                                       | This does not give as a detailed insight into the role of joint commissioning or how LAs influence CCG procurement of nursing                                                                                                                                                                                                                                                                    |

|                                           |                      |                                                                                                                                                                                                                                                                                                                                         |                                                                                                                                                                                                                                                                                                 |                                                                                                                                                                                                           |
|-------------------------------------------|----------------------|-----------------------------------------------------------------------------------------------------------------------------------------------------------------------------------------------------------------------------------------------------------------------------------------------------------------------------------------|-------------------------------------------------------------------------------------------------------------------------------------------------------------------------------------------------------------------------------------------------------------------------------------------------|-----------------------------------------------------------------------------------------------------------------------------------------------------------------------------------------------------------|
|                                           |                      |                                                                                                                                                                                                                                                                                                                                         | allows us to control for any confounding from local authority expenditure – which over this period suffered from large funding cuts.                                                                                                                                                            | homes, some of which will be owned and run by LAs.                                                                                                                                                        |
| Claimant Rate                             | ONS (Claimant Count) | <a href="https://www.nomisweb.co.uk/query/select/getdatasetbytheme.asp?opt=3&amp;theme=&amp;subgrp=">https://www.nomisweb.co.uk/query/select/getdatasetbytheme.asp?opt=3&amp;theme=&amp;subgrp=</a>                                                                                                                                     | Claimant rate is a good measure for being able to calculate the labour market activity.                                                                                                                                                                                                         | Data is reported at the LA level so we aggregate a mean based on overlapping geographies.                                                                                                                 |
| Population size                           | ONS                  | <a href="https://www.ons.gov.uk/peoplepopulationandcommunity/populationandmigration/populationestimates/datasets/clinicalcommissioninggroupmidyearpopulationestimates">https://www.ons.gov.uk/peoplepopulationandcommunity/populationandmigration/populationestimates/datasets/clinicalcommissioninggroupmidyearpopulationestimates</a> | Population size is important given changes to the size of a population are often described as being difficult for health systems – particularly given underfunding for these changes. Given the panel data analysis we use, changes in population also represent changes to population density. | We analyse within CCGs but there is more to be assessed in terms of whether rural and urban areas experience this phenomenon differently. The overall population variable cannot help us understand this. |
| Unemployment Rate                         | ONS (APS)            | <a href="https://www.nomisweb.co.uk/query/select/getdatasetbytheme.asp?opt=3&amp;theme=&amp;subgrp=">https://www.nomisweb.co.uk/query/select/getdatasetbytheme.asp?opt=3&amp;theme=&amp;subgrp=</a>                                                                                                                                     | There will be some overlap between unemployment and claimant count but unemployment will only measure those without any job so covers a more acute definition of labour market activity.                                                                                                        | Data is reported at the LA level so we aggregate a mean based on overlapping geographies.                                                                                                                 |
| Ethnic Minority (%)                       | ONS (APS)            | <a href="https://www.nomisweb.co.uk/query/select/getdatasetbytheme.asp?opt=3&amp;theme=&amp;subgrp=">https://www.nomisweb.co.uk/query/select/getdatasetbytheme.asp?opt=3&amp;theme=&amp;subgrp=</a>                                                                                                                                     | It is important to control for changes in ethnicity of populations given the disproportionate impact of poor health care on ethnic minorities.                                                                                                                                                  | This is a blunt measure of the % of ethnic minority and does not break down different ethnicities. While such an analysis is beyond the remit of this paper, it is an important question worth exploring. |
| Degree Education (%)                      | ONS (APS)            | <a href="https://www.nomisweb.co.uk/query/select/getdatasetbytheme.asp?opt=3&amp;theme=&amp;subgrp=">https://www.nomisweb.co.uk/query/select/getdatasetbytheme.asp?opt=3&amp;theme=&amp;subgrp=</a>                                                                                                                                     | This measures the percent of people holding degree-level qualifications in a population.                                                                                                                                                                                                        | Data is reported at the LA level so we aggregate a mean based on overlapping geographies.                                                                                                                 |
| Average Disposable H.hold Income          | ONS (GDHI)           | <a href="https://www.ons.gov.uk/economy/regionalaccounts/grossdisposablehouseholdincome/datasets/regionalgrossdisposablehouseholdincome/localauthoritiesbyitl1region">https://www.ons.gov.uk/economy/regionalaccounts/grossdisposablehouseholdincome/datasets/regionalgrossdisposablehouseholdincome/localauthoritiesbyitl1region</a>   | This is a good measure of income – which will be important in terms of ability to access alternative healthcare in the case of deteriorating healthcare quality from the NHS                                                                                                                    | This is a blunt measure of the average income and cannot assess the % of very wealthy people able to afford regular private care nor the % of people experiencing extreme poverty.                        |
| Managerial or Professional Occupation (%) | ONS (APS)            | <a href="https://www.nomisweb.co.uk/query/select/getdatasetbytheme.asp?opt=3&amp;theme=&amp;subgrp=">https://www.nomisweb.co.uk/query/select/getdatasetbytheme.asp?opt=3&amp;theme=&amp;subgrp=</a>                                                                                                                                     | This measures the percent of people with managerial or professional occupations, which tells us something about the occupational class of an area. It may also control for the % of people with a possibility of receiving some form of private health insurance from their employer.           | This cannot break down the impact of healthcare outsourcing/ deterioration on the health of different social classes.                                                                                     |



## S.24. Causes of Treatable Mortality

Treatable mortality rates are a measure of health system performance based on the number of deaths from causes considered to be avoidable through direct medical intervention. Below we present all the causes that are counted in this measure. Some are marked 50% because they are considered 50% treatable (medical intervention) and 50% preventable (public health intervention).

| Condition group and cause                                   | ICD-10 codes                         | Age  | Treatable |
|-------------------------------------------------------------|--------------------------------------|------|-----------|
| <b>Infectious diseases</b>                                  |                                      |      |           |
| Tuberculosis                                                | A15-A19, B90, J65                    | 0-74 | • (50%)   |
| Scarlet fever                                               | A38                                  | 0-74 | •         |
| Sepsis                                                      | A40 (excl. A40.3), A41 (excl. A41.3) | 0-74 | •         |
| Cellulitis                                                  | A46, L03                             | 0-74 | •         |
| Legionnaires disease                                        | A48.1                                | 0-74 | •         |
| Streptococcal and enterococci infection                     | A49.1                                | 0-74 | •         |
| Other meningitis                                            | G00.2, G00.3, G00.8, G00.9           | 0-74 | •         |
| Meningitis due to other and unspecified causes              | G03                                  | 0-74 | •         |
| <b>Neoplasms</b>                                            |                                      |      |           |
| Cervical cancer                                             | C53                                  | 0-74 | • (50%)   |
| Colorectal cancer                                           | C18-C21                              | 0-74 | •         |
| Breast cancer (female only)                                 | C50                                  | 0-74 | •         |
| Uterus cancer                                               | C54, C55                             | 0-74 | •         |
| Testicular cancer                                           | C62                                  | 0-74 | •         |
| Thyroid cancer                                              | C73                                  | 0-74 | •         |
| Hodgkin's disease                                           | C81                                  | 0-74 | •         |
| Lymphoid leukaemia                                          | C91.0, C91.1                         | 0-74 | •         |
| Benign neoplasm                                             | D10-D36                              | 0-74 | •         |
| <b>Endocrine and metabolic diseases</b>                     |                                      |      |           |
| Diabetes mellitus                                           | E10-E14                              | 0-74 | • (50%)   |
| Thyroid disorders                                           | E00-E07                              | 0-74 | •         |
| Adrenal disorders                                           | E24-E25 (excl. E24.4), E27           | 0-74 | •         |
| <b>Diseases of the nervous system</b>                       |                                      |      |           |
| Epilepsy                                                    | G40, G41                             | 0-74 | •         |
| <b>Diseases of the circulatory system</b>                   |                                      |      |           |
| Aortic aneurysm                                             | I71                                  | 0-74 | • (50%)   |
| Hypertensive diseases                                       | I10-I13, I15                         | 0-74 | • (50%)   |
| Ischaemic heart diseases                                    | I20-I25                              | 0-74 | • (50%)   |
| Cerebrovascular diseases                                    | I60-I69                              | 0-74 | • (50%)   |
| Other atherosclerosis                                       | I70, I73.9                           | 0-74 | • (50%)   |
| Rheumatic and other heart diseases                          | I00-I09                              | 0-74 | •         |
| Venous thromboembolism                                      | I26, I80, I82.9                      | 0-74 | •         |
| <b>Diseases of the respiratory system</b>                   |                                      |      |           |
| Upper respiratory infections                                | J00-J06, J30-J39                     | 0-74 | •         |
| Pneumonia, not elsewhere classified or organism unspecified | J12, J15, J16-J18                    | 0-74 | •         |

|                                                                                         |                                            |      |   |
|-----------------------------------------------------------------------------------------|--------------------------------------------|------|---|
| Acute lower respiratory infections                                                      | J20-J22                                    | 0-74 | • |
| Asthma and bronchiectasis                                                               | J45-J47                                    | 0-74 | • |
| Adult respiratory distress syndrome                                                     | J80                                        | 0-74 | • |
| Pulmonary oedema                                                                        | J81                                        | 0-74 | • |
| Abscess of lung and mediastinum pyothorax                                               | J85, J86                                   | 0-74 | • |
| Other pleural disorders                                                                 | J90, J93, J94                              | 0-74 | • |
| <b>Diseases of the digestive system</b>                                                 |                                            |      |   |
| Gastric and duodenal ulcer                                                              | K25-K28                                    | 0-74 | • |
| Appendicitis                                                                            | K35-K38                                    | 0-74 | • |
| Abdominal hernia                                                                        | K40-K46                                    | 0-74 | • |
| Cholelithiasis and cholecystitis                                                        | K80-K81                                    | 0-74 | • |
| Other diseases of gallbladder or biliary tract                                          | K82-K83                                    | 0-74 | • |
| Acute pancreatitis                                                                      | K85.0, K85.1, K85.3, K85.8, K85.9          | 0-74 | • |
| Other diseases of pancreas                                                              | K86.1, K86.2, K86.3, K86.8, K86.9          | 0-74 | • |
| <b>Diseases of the genitourinary system</b>                                             |                                            |      |   |
| Nephritis and nephrosis                                                                 | N00-N07                                    | 0-74 | • |
| Obstructive uropathy                                                                    | N13, N20-N21, N35                          | 0-74 | • |
| Renal failure                                                                           | N17-N19                                    | 0-74 | • |
| Renal colic                                                                             | N23                                        | 0-74 | • |
| Disorders resulting from renal tubular dysfunction                                      | N25                                        | 0-74 | • |
| Unspecified contracted kidney, small kidney of unknown cause                            | N26-N27                                    | 0-74 | • |
| Inflammatory diseases of genitourinary system                                           | N34.1, N70-N73, N75.0, N75.1, N76.4, N76.6 | 0-74 | • |
| Prostatic hyperplasia                                                                   | N40                                        | 0-74 | • |
| <b>Pregnancy, childbirth and the perinatal period</b>                                   |                                            |      |   |
| Pregnancy, childbirth and the puerperium                                                | O00-O99                                    | 0-74 | • |
| Certain conditions originating in the perinatal period                                  | P00-P96                                    | 0-74 | • |
| <b>Congenital malformations</b>                                                         |                                            |      |   |
| Congenital malformations of the circulatory system (heart defects)                      | Q20-Q28                                    | 0-74 | • |
| <b>Adverse effects of medical and surgical care</b>                                     |                                            |      |   |
| Drugs, medicaments and biological substances causing adverse effects in therapeutic use | Y40-Y59                                    | 0-74 | • |
| Misadventures to patients during surgical and medical care                              | Y60-Y69, Y83-Y84                           | 0-74 | • |
| Medical devices associated with adverse incidents in diagnostic and therapeutic use     | Y70-Y82                                    | 0-74 | • |

## S.25. CCG Level data

### S.25.1 Table of Outsourcing and Treatable Mortality

Below we present a table with the total levels of Outsourcing for each CCG as well as the average treatable mortality rate for each CCG and the total number of treatable deaths between 2013 and 2020.

|    | CCG            | Total Spend (£10Ms) | Private sector spend (£10Ms) | For-profit outsourcing (%) | Total Treatable Deaths | Average Treatable Mortality Rate |
|----|----------------|---------------------|------------------------------|----------------------------|------------------------|----------------------------------|
| 1  | NHS_ASH_CCG    | 89.1967             | 4.1937                       | 4.7017                     | 479.5                  | 70.7500                          |
| 2  | NHS_AWC_CCG    | 121.4167            | 2.4123                       | 1.9868                     | 688.5                  | 74.9833                          |
| 3  | NHS_BAB_CCG    | 138.4894            | 5.8414                       | 4.2180                     | 1380.0                 | 78.3857                          |
| 4  | NHS_BAH_CCG    | 58.8687             | 3.7538                       | 6.3765                     | 1298.0                 | 83.9857                          |
| 5  | NHS_BANE_CCG   | 121.2854            | 14.1856                      | 11.6961                    | 630.5                  | 67.6667                          |
| 6  | NHS_BARK_CCG   | 11.6919             | 0.7148                       | 6.1133                     | 908.5                  | 113.7714                         |
| 7  | NHS_BARNET_CCG | 134.5444            | 6.0226                       | 4.4763                     | 1056.0                 | 65.9833                          |
| 8  | NHS_BARNES_CCG | 213.3432            | 5.2981                       | 2.4834                     | 1682.0                 | 94.8000                          |
| 9  | NHS_BASS_CCG   | 63.3614             | 3.6676                       | 5.7884                     | 812.5                  | 88.3143                          |
| 10 | NHS_BED_CCG    | 274.7652            | 25.5960                      | 9.3156                     | 2105.5                 | 78.6143                          |
| 11 | NHS_BEX_CCG    | 106.4552            | 3.0015                       | 2.8195                     | 882.5                  | 78.4167                          |
| 12 | NHS_BIRM_CCG   | 286.9020            | 14.6588                      | 5.1093                     | 6754.5                 | 99.6571                          |
| 13 | NHS_BLACK_CCG  | 1.9550              | 0.1673                       | 8.5573                     | 1415.5                 | 133.9571                         |
| 14 | NHS_BNSGSG_CCG | 235.9059            | 42.2482                      | 17.9089                    | 4665.5                 | 78.5286                          |
| 15 | NHS_BOLT_CCG   | 61.7357             | 4.2177                       | 6.8318                     | 2034.5                 | 105.6571                         |
| 16 | NHS_BRAC_CCG   | 75.8158             | 2.1120                       | 2.7857                     | 359.0                  | 161.8333                         |
| 17 | NHS_BRAD_CCG   | 250.4083            | 6.8274                       | 2.7265                     | 1659.0                 | 109.5500                         |
| 18 | NHS_BREN_CCG   | 3.0066              | 0.1443                       | 4.7993                     | 1241.0                 | 83.4571                          |
| 19 | NHS_BROM_CCG   | 31.8450             | 3.8672                       | 12.1437                    | 1060.0                 | 66.5000                          |
| 20 | NHS_BUCK_CCG   | 7.7327              | 0.1529                       | 1.9778                     | 2378.0                 | 63.3857                          |
| 21 | NHS_BURY_CCG   | 72.9005             | 3.0352                       | 4.1635                     | 1212.5                 | 92.9143                          |
| 22 | NHS_BWD_CCG    | 127.7320            | 8.3127                       | 6.5079                     | 1032.5                 | 115.1000                         |
| 23 | NHS_CAH_CCG    | 5.0151              | 0.1782                       | 3.5525                     | 1027.0                 | 104.8000                         |
| 24 | NHS_CAMD_CCG   | 4.8493              | 0.5652                       | 11.6563                    | 626.5                  | 67.9667                          |
| 25 | NHS_CANN_CCG   | 44.5648             | 0.8544                       | 1.9171                     | 849.5                  | 82.4000                          |
| 26 | NHS_CANT_CCG   | 157.9543            | 8.3393                       | 5.2796                     | 852.5                  | 76.1500                          |
| 27 | NHS_CAP_CCG    | 504.6382            | 20.2925                      | 4.0212                     | 4385.5                 | 74.9286                          |
| 28 | NHS_CAR_CCG    | 323.1070            | 9.4394                       | 2.9215                     | 2123.5                 | 91.3143                          |
| 29 | NHS_COR_CCG    | 38.9518             | 1.0503                       | 2.6964                     | 352.0                  | 112.6833                         |
| 30 | NHS_CPR_CCG    | 72.0828             | 3.3643                       | 4.6672                     | 1072.0                 | 74.3286                          |
| 31 | NHS_CRAW_CCG   | 111.1547            | 2.0091                       | 1.8075                     | 402.5                  | 87.5500                          |
| 32 | NHS_CRO_CCG    | 33.1473             | 0.8641                       | 2.6069                     | 1442.5                 | 88.5667                          |
| 33 | NHS_CSR_CCG    | 132.0259            | 4.5612                       | 3.4548                     | 1105.0                 | 85.1714                          |
| 34 | NHS_CWS_CCG    | 404.0761            | 13.2337                      | 3.2751                     | 2289.5                 | 74.4667                          |
| 35 | NHS_DAD_CCG    | 118.8040            | 4.7660                       | 4.0116                     | 6451.5                 | 85.7571                          |
| 36 | NHS_DARL_CCG   | 17.6710             | 1.1233                       | 6.3565                     | 532.5                  | 92.7667                          |
| 37 | NHS_DDES_CCG   | 68.6262             | 4.1470                       | 6.0429                     | 1526.0                 | 96.6333                          |
| 38 | NHS_DEV_CCG    | 13.0000             | 0.4656                       | 3.5814                     | 7181.5                 | 76.4143                          |
| 39 | NHS_DONC_CCG   | 194.8222            | 16.0047                      | 8.2151                     | 2134.5                 | 96.9000                          |
| 40 | NHS_DORS_CCG   | 564.0929            | 24.4047                      | 4.3264                     | 4424.5                 | 71.3571                          |
| 41 | NHS_DUD_CCG    | 77.0217             | 3.3675                       | 4.3722                     | 1789.0                 | 88.9714                          |
| 42 | NHS_EACH_CCG   | 28.5459             | 10.4597                      | 36.6417                    | 825.5                  | 69.3667                          |
| 43 | NHS_EAL_CCG    | 31.0159             | 0.7564                       | 2.4389                     | 1400.5                 | 86.8000                          |
| 44 | NHS_EALA_CCG   | 263.6262            | 13.7482                      | 5.2150                     | 2769.0                 | 101.7857                         |
| 45 | NHS_EANH_CCG   | 411.3464            | 16.7221                      | 4.0652                     | 2730.0                 | 75.8429                          |
| 46 | NHS_EASU_CCG   | 27.5225             | 2.6953                       | 9.7931                     | 675.0                  | 73.5000                          |
| 47 | NHS_EBERK_CCG  | 236.6322            | 4.5800                       | 1.9355                     | 1668.0                 | 76.6714                          |
| 48 | NHS_EHS_CCG    | 126.5896            | 3.0757                       | 2.4296                     | 878.5                  | 76.5333                          |
| 49 | NHS_ELAR_CCG   | 5.6447              | 0.3613                       | 6.4004                     | 1737.5                 | 67.6000                          |
| 50 | NHS_ENF_CCG    | 62.6354             | 2.8353                       | 4.5267                     | 1050.0                 | 77.8667                          |
| 51 | NHS_ERY_CCG    | 166.8333            | 12.6663                      | 7.5922                     | 2212.5                 | 79.8714                          |
| 52 | NHS_ESTA_CCG   | 59.9979             | 8.1278                       | 13.5468                    | 810.0                  | 87.7429                          |
| 53 | NHS_FAG_CCG    | 147.5144            | 4.7309                       | 3.2071                     | 977.0                  | 73.4857                          |
| 54 | NHS_FW_CCG     | 1.9550              | 0.1673                       | 8.5573                     | 1486.5                 | 91.0857                          |
| 55 | NHS_GHOU_CCG   | 148.7779            | 18.6483                      | 12.5343                    | 1312.5                 | 88.8286                          |
| 56 | NHS_GLOU_CCG   | 451.8417            | 13.3179                      | 2.9475                     | 3547.0                 | 75.1857                          |
| 57 | NHS_GPRE_CCG   | 151.9930            | 5.9471                       | 3.9127                     | 1262.0                 | 95.9857                          |
| 58 | NHS_GREE_CCG   | 3.0216              | 0.3164                       | 10.4725                    | 950.0                  | 94.8500                          |
| 59 | NHS_GYAW_CCG   | 1.7797              | 0.2068                       | 11.6217                    | 1159.0                 | 87.1833                          |
| 60 | NHS_HAF_CCG    | 3.4430              | 0.0688                       | 1.9983                     | 626.5                  | 81.6143                          |
| 61 | NHS_HALT_CCG   | 94.9133             | 1.6843                       | 1.7746                     | 960.0                  | 103.1286                         |
| 62 | NHS_HAMS_CCG   | 247.3962            | 16.6362                      | 6.7245                     | 802.5                  | 63.9333                          |
| 63 | NHS_HAR_CCG    | 144.5336            | 6.7353                       | 4.6600                     | 1073.5                 | 93.2000                          |
| 64 | NHS_HARD_CCG   | 1.9596              | 0.0067                       | 0.3434                     | 642.5                  | 68.8333                          |
| 65 | NHS_HARI_CCG   | 13.5318             | 1.9170                       | 14.1665                    | 839.5                  | 89.2167                          |
| 66 | NHS_HARR_CCG   | 44.8492             | 2.4334                       | 5.4258                     | 896.0                  | 68.5143                          |
| 67 | NHS_HAST_CCG   | 38.6745             | 0.8367                       | 2.1633                     | 1436.0                 | 96.5667                          |
| 68 | NHS_HERE_CCG   | 142.1713            | 4.3873                       | 3.0859                     | 907.0                  | 78.1333                          |

|     |                |          |         |         |        |          |
|-----|----------------|----------|---------|---------|--------|----------|
| 69  | NHS_HERT_CCG   | 186.4982 | 10.0641 | 5.3964  | 2745.0 | 73.3857  |
| 70  | NHS_HILL_CCG   | 57.0294  | 3.2323  | 5.6678  | 1163.5 | 81.9000  |
| 71  | NHS_HMR_CCG    | 53.0589  | 2.4846  | 4.6827  | 1577.0 | 112.2286 |
| 72  | NHS_HRAW_CCG   | 90.5708  | 1.4612  | 1.6133  | 663.0  | 68.9500  |
| 73  | NHS_HULL_CCG   | 199.7943 | 36.7281 | 18.3830 | 1874.0 | 117.9286 |
| 74  | NHS_HWLH_CCG   | 22.6649  | 4.2653  | 18.8189 | 668.0  | 63.9667  |
| 75  | NHS_IAES_CCG   | 137.5530 | 11.7194 | 8.5199  | 2257.5 | 72.3000  |
| 76  | NHS_IOW_CCG    | 87.2929  | 1.9513  | 2.2353  | 856.0  | 77.5286  |
| 77  | NHS_KERN_CCG   | 126.6256 | 7.9390  | 6.2697  | 3685.0 | 78.1429  |
| 78  | NHS_KING_CCG   | 74.0873  | 12.1660 | 16.4212 | 489.0  | 68.7833  |
| 79  | NHS_KNOW_CCG   | 26.2597  | 1.0881  | 4.1438  | 1157.0 | 115.7286 |
| 80  | NHS_LAMB_CCG   | 42.5439  | 0.5722  | 1.3449  | 955.0  | 99.7667  |
| 81  | NHS_LEE_CCG    | 609.7731 | 27.3572 | 4.4865  | 4338.5 | 93.6571  |
| 82  | NHS_LEIC_CCG   | 2.8155   | 0.1556  | 5.5255  | 1948.0 | 110.5286 |
| 83  | NHS_LINE_CCG   | 150.5100 | 4.7180  | 3.1347  | 1516.5 | 97.3167  |
| 84  | NHS_LINW_CCG   | 161.2271 | 7.6162  | 4.7239  | 1166.0 | 90.8667  |
| 85  | NHS_LIVE_CCG   | 422.9544 | 18.4691 | 4.3667  | 3273.0 | 113.6000 |
| 86  | NHS_MAA_CCG    | 39.4745  | 2.4474  | 6.1998  | 1078.5 | 99.2333  |
| 87  | NHS_MCB_CCG    | 184.0824 | 5.8044  | 3.1532  | 2124.5 | 80.9857  |
| 88  | NHS_MED_CCG    | 25.6557  | 4.9932  | 19.4624 | 1212.5 | 91.1333  |
| 89  | NHS_MERT_CCG   | 72.9919  | 2.1740  | 2.9784  | 633.5  | 78.3333  |
| 90  | NHS_MESS_CCG   | 238.9167 | 25.0644 | 10.4909 | 2029.0 | 70.1714  |
| 91  | NHS_MK_CCG     | 81.7869  | 3.9037  | 4.7730  | 1184.5 | 83.1000  |
| 92  | NHS_NAG_CCG    | 11.1884  | 0.2961  | 2.6461  | 2967.0 | 96.9714  |
| 93  | NHS_NAS_CCG    | 28.1428  | 1.4429  | 5.1269  | 540.0  | 76.3000  |
| 94  | NHS_NDUR_CCG   | 48.5737  | 1.9554  | 4.0255  | 1122.5 | 82.3500  |
| 95  | NHS_NEES_CCG   | 258.6982 | 32.5699 | 12.5899 | 2133.5 | 83.8000  |
| 96  | NHS_NEHF_CCG   | 153.1753 | 9.6364  | 6.2911  | 815.0  | 66.9143  |
| 97  | NHS_NEL_CCG    | 137.1784 | 26.5189 | 19.3317 | 1079.0 | 94.0000  |
| 98  | NHS_NENE_CCG   | 43.9367  | 2.7153  | 6.1800  | 2904.0 | 85.5333  |
| 99  | NHS_NEWH_CCG   | 2.3938   | 0.0071  | 0.2986  | 1173.5 | 100.6571 |
| 100 | NHS_NH_CCG     | 3.9765   | 0.2041  | 5.1329  | 922.5  | 67.5000  |
| 101 | NHS_NK_CCG     | 101.5054 | 13.0264 | 12.8332 | 1035.5 | 96.0571  |
| 102 | NHS_NL_CCG     | 106.1363 | 3.4217  | 3.2238  | 1184.0 | 90.6429  |
| 103 | NHS_NN_CCG     | 37.0446  | 1.3956  | 3.7673  | 861.0  | 71.8167  |
| 104 | NHS_NNAE_CCG   | 73.3396  | 6.4838  | 8.8408  | 660.0  | 79.7500  |
| 105 | NHS_NOCL_CCG   | 225.8444 | 45.3639 | 20.0863 | 1375.5 | 118.3333 |
| 106 | NHS_NORC_CCG   | 46.6250  | 1.6254  | 3.4861  | 2187.5 | 84.7286  |
| 107 | NHS_NORW_CCG   | 118.1798 | 4.4186  | 3.7389  | 823.0  | 80.5500  |
| 108 | NHS_NOST_CCG   | 94.2442  | 5.0527  | 5.3613  | 1438.0 | 84.0571  |
| 109 | NHS_NT_CCG     | 2.0774   | 0.0344  | 1.6555  | 1345.0 | 89.0000  |
| 110 | NHS_NW_CCG     | 69.4064  | 6.6690  | 9.6086  | 486.5  | 77.6667  |
| 111 | NHS_NWS_CCG    | 45.7581  | 5.4882  | 11.9940 | 1233.0 | 72.1833  |
| 112 | NHS_OLD_CCG    | 117.5544 | 9.4533  | 8.0417  | 1649.5 | 109.7286 |
| 113 | NHS_OXFO_CCG   | 74.1177  | 1.9666  | 2.6533  | 3030.5 | 68.6429  |
| 114 | NHS_PORT_CCG   | 148.6379 | 7.0648  | 4.7530  | 1113.5 | 95.4714  |
| 115 | NHS_RAB_CCG    | 122.6959 | 3.5011  | 2.8535  | 822.5  | 81.3833  |
| 116 | NHS_RICH_CCG   | 41.7409  | 1.1773  | 2.8206  | 563.0  | 61.8333  |
| 117 | NHS_ROTH_CCG   | 199.6942 | 5.3701  | 2.6892  | 1954.0 | 100.5143 |
| 118 | NHS_RUSH_CCG   | 52.5452  | 6.1027  | 11.6143 | 446.5  | 69.6667  |
| 119 | NHS_SAF_CCG    | 106.4715 | 4.1606  | 3.9077  | 743.0  | 76.9000  |
| 120 | NHS_SAL_CCG    | 222.7918 | 7.0117  | 3.1472  | 1669.5 | 113.7000 |
| 121 | NHS_SAS_CCG    | 52.8758  | 3.2265  | 6.1021  | 898.0  | 74.1286  |
| 122 | NHS_SAWB_CCG   | 390.6946 | 19.8621 | 5.0838  | 2705.5 | 116.5857 |
| 123 | NHS_SCAR_CCG   | 31.3256  | 1.6070  | 5.1300  | 640.0  | 90.1500  |
| 124 | NHS_SCHE_CCG   | 57.8572  | 1.9774  | 3.4178  | 905.5  | 88.1167  |
| 125 | NHS_SD_CCG     | 164.7748 | 20.6561 | 12.5360 | 968.5  | 61.9667  |
| 126 | NHS_SEH_CCG    | 158.5507 | 6.7024  | 4.2273  | 1033.5 | 70.2286  |
| 127 | NHS_SEND_CCG   | 53.3497  | 2.6433  | 4.9548  | 1111.5 | 88.7000  |
| 128 | NHS_SESASP_CCG | 9.7573   | 0.2299  | 2.3563  | 1377.0 | 77.1714  |
| 129 | NHS_SH_CCG     | 32.5019  | 0.4297  | 1.3221  | 344.5  | 57.9000  |
| 130 | NHS_SHEF_CCG   | 442.5339 | 16.3329 | 3.6908  | 3007.0 | 87.2714  |
| 131 | NHS_SHRO_CCG   | 3.1941   | 0.1066  | 3.3369  | 1736.5 | 76.0143  |
| 132 | NHS_SKC_CCG    | 53.4247  | 4.2064  | 7.8734  | 1055.5 | 84.6000  |
| 133 | NHS_SL_CCG     | 87.6896  | 2.8980  | 3.3048  | 698.0  | 78.5167  |
| 134 | NHS_SN_CCG     | 131.6253 | 5.8571  | 4.4498  | 944.5  | 67.8000  |
| 135 | NHS_SOME_CCG   | 406.1872 | 19.6904 | 4.8476  | 3169.5 | 69.9714  |
| 136 | NHS_SOT_CCG    | 69.1321  | 3.3099  | 4.7878  | 1049.0 | 91.5000  |
| 137 | NHS_SOTE_CCG   | 59.3278  | 1.7189  | 2.8973  | 1645.0 | 113.2000 |
| 138 | NHS_SOTY_CCG   | 9.8111   | 0.1832  | 1.8677  | 1045.0 | 93.0000  |
| 139 | NHS_SS_CCG     | 140.6365 | 3.9594  | 2.8154  | 1184.0 | 99.3143  |
| 140 | NHS_STOC_CCG   | 232.4979 | 13.6225 | 5.8592  | 1688.5 | 80.5000  |
| 141 | NHS_STOK_CCG   | 117.8769 | 8.4045  | 7.1299  | 1750.5 | 98.3000  |
| 142 | NHS_SUN_CCG    | 61.9920  | 2.6068  | 4.2051  | 1985.0 | 97.2571  |
| 143 | NHS_SUTT_CCG   | 69.7308  | 1.9908  | 2.8550  | 675.0  | 73.8000  |
| 144 | NHS_SWAR_CCG   | 96.1228  | 3.0818  | 3.2061  | 1274.0 | 72.6429  |
| 145 | NHS_SWARK_CCG  | 12.2270  | 0.1375  | 1.1250  | 908.0  | 92.7167  |
| 146 | NHS_SWIN_CCG   | 116.8057 | 6.0906  | 5.2143  | 915.5  | 86.5000  |
| 147 | NHS_SWL_CCG    | 74.3440  | 2.7406  | 3.6863  | 623.5  | 83.1833  |
| 148 | NHS_SWOR_CCG   | 77.5220  | 2.9516  | 3.8075  | 1340.0 | 75.8333  |

|     |              |          |         |         |        |          |
|-----|--------------|----------|---------|---------|--------|----------|
| 149 | NHS_TAG_CCG  | 165.9142 | 7.6193  | 4.5923  | 1868.0 | 103.6286 |
| 150 | NHS_TAW_CCG  | 46.0825  | 0.5581  | 1.2112  | 974.5  | 94.4714  |
| 151 | NHS_THAN_CCG | 67.7331  | 2.1346  | 3.1515  | 802.0  | 96.6500  |
| 152 | NHS_THUR_CCG | 77.9838  | 2.0130  | 2.5814  | 858.5  | 86.9000  |
| 153 | NHS_TRAF_CCG | 149.6637 | 6.6295  | 4.4296  | 1200.5 | 79.4571  |
| 154 | NHS_VOR_CCG  | 33.1918  | 0.9497  | 2.8612  | 478.0  | 81.9333  |
| 155 | NHS_VOY_CCG  | 126.6822 | 1.2983  | 1.0249  | 1988.5 | 77.7286  |
| 156 | NHS_WAB_CCG  | 202.8905 | 7.1108  | 3.5048  | 2443.0 | 104.2714 |
| 157 | NHS_WAKE_CCG | 273.4190 | 13.4785 | 4.9296  | 2416.5 | 96.9571  |
| 158 | NHS_WALS_CCG | 177.3103 | 5.5416  | 3.1254  | 1650.0 | 103.5000 |
| 159 | NHS_WALT_CCG | 53.8998  | 2.5473  | 4.7260  | 1090.5 | 93.7714  |
| 160 | NHS_WARN_CCG | 24.5900  | 0.7369  | 2.9968  | 1140.0 | 90.8429  |
| 161 | NHS_WARR_CCG | 122.9043 | 3.5833  | 2.9155  | 1302.0 | 88.3714  |
| 162 | NHS_WC_CCG   | 37.7062  | 1.3124  | 3.4807  | 999.0  | 76.2667  |
| 163 | NHS_WESS_CCG | 223.3604 | 7.6282  | 3.4152  | 1527.5 | 73.4714  |
| 164 | NHS_WHAM_CCG | 6.0896   | 0.3332  | 5.4709  | 2370.5 | 61.8286  |
| 165 | NHS_WILT_CCG | 326.7789 | 39.7173 | 12.1542 | 1944.5 | 70.4833  |
| 166 | NHS_WIRR_CCG | 260.6889 | 12.3664 | 4.7437  | 2306.5 | 93.3857  |
| 167 | NHS_WKEN_CCG | 308.6818 | 11.9971 | 3.8866  | 1800.0 | 71.3667  |
| 168 | NHS_WL_CCG   | 10.7974  | 4.8475  | 44.8950 | 705.0  | 61.5571  |
| 169 | NHS_WLAN_CCG | 77.8140  | 5.1574  | 6.6278  | 725.5  | 82.8857  |
| 170 | NHS_WLEI_CCG | 35.4466  | 1.6765  | 4.7297  | 2148.5 | 73.8429  |
| 171 | NHS_WN_CCG   | 11.8710  | 0.5032  | 4.2389  | 866.0  | 77.7667  |
| 172 | NHS_WS_CCG   | 49.7483  | 4.1690  | 8.3803  | 1125.0 | 65.6429  |
| 173 | NHS_WYRE_CCG | 61.3737  | 2.6873  | 4.3787  | 515.0  | 81.5000  |

### S.25.2 Stripe plot

We can also present the monthly changes to outsourcing for each CCG. Here we limit the scale to 0-10 to be able to show the variation between CCGs and across time.

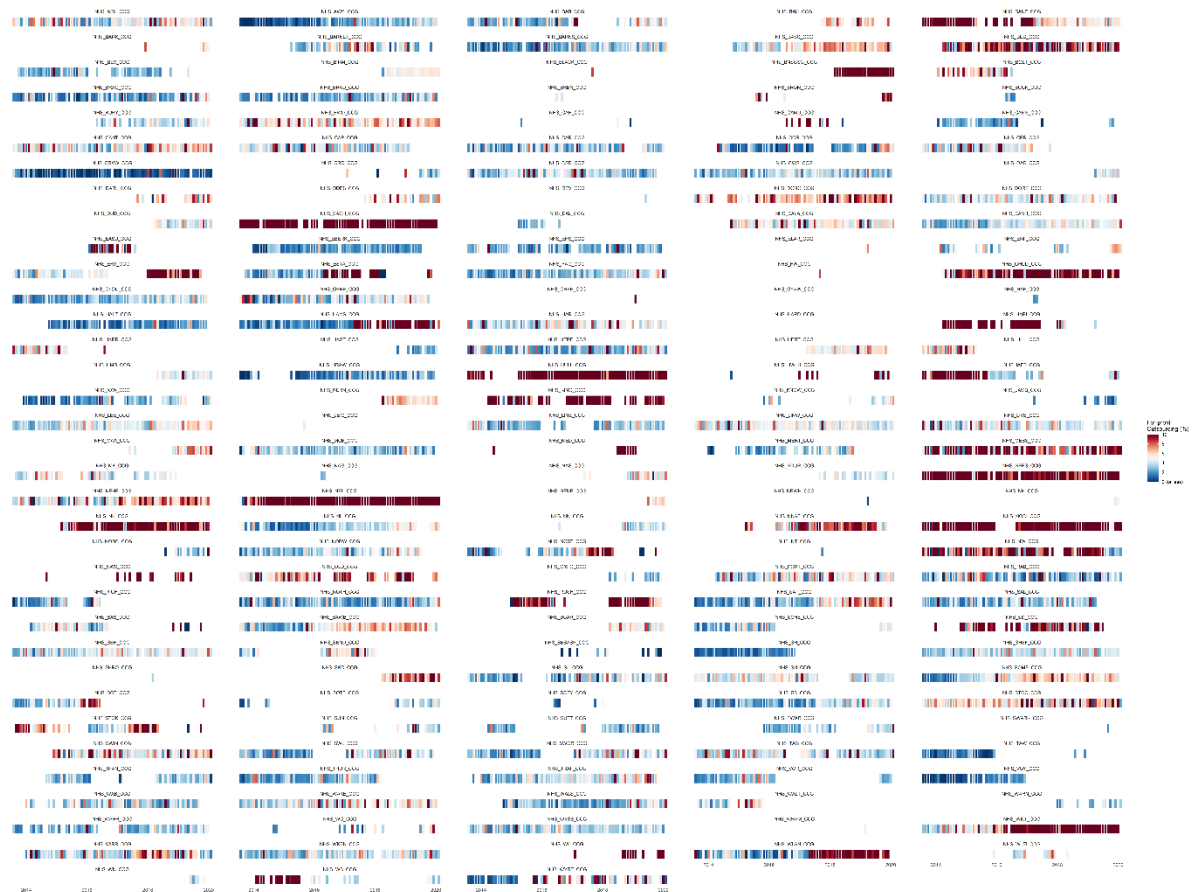

## Reporting Checklists and Statements

### S.26. STROBE Checklist

|                           | <b>Item No.</b> | <b>Recommendation</b>                                                                               | <b>Page No.</b> | <b>Relevant text from manuscript</b>                                                                                                                                                                                                                                                                                                                                                                                                                                                                                                                                                    |
|---------------------------|-----------------|-----------------------------------------------------------------------------------------------------|-----------------|-----------------------------------------------------------------------------------------------------------------------------------------------------------------------------------------------------------------------------------------------------------------------------------------------------------------------------------------------------------------------------------------------------------------------------------------------------------------------------------------------------------------------------------------------------------------------------------------|
| <b>Title and abstract</b> | 1               | (a) Indicate the study's design with a commonly used term in the title or the abstract              | 1               | Observational analysis                                                                                                                                                                                                                                                                                                                                                                                                                                                                                                                                                                  |
|                           |                 | (b) Provide in the abstract an informative and balanced summary of what was done and what was found | 1               | <p>"estimate multivariate longitudinal regression models with CCG-level fixed effects analysing the effects of for-profit outsourcing on treatable mortality rates in the following year."</p> <p>"An annual increase of one percentage point of outsourcing to the private sector corresponds with an annual increase in treatable mortality of 0.38% or 0.29 deaths per 100,000 population (95% CI 0.15% to 0.62%; p= 0.0055) in the following year."</p>                                                                                                                             |
| <b>Introduction</b>       |                 |                                                                                                     |                 |                                                                                                                                                                                                                                                                                                                                                                                                                                                                                                                                                                                         |
| Background/rationale      | 2               | Explain the scientific background and rationale for the investigation being reported                | 3               | <p>"But the evidence on the impact of 'creeping privatisation' in general and in England's NHS specifically remains uncertain. In general, these findings are often inconclusive in that they do not analyse the aggregate effect of outsourcing on service-wide performance [13, 14]. Moreover, such comparisons between for-profit and not-for profit providers are often inappropriate because the case-mixes of private and public services are quite different."</p>                                                                                                               |
| Objectives                | 3               | State specific objectives, including any prespecified hypotheses                                    | 4               | <p>"In this paper, we examine the impact on treatable mortality of increased outsourcing to private for-profit providers from England's CCGs during the period immediately following the implementation of the 2012 Health and Social Care Act. To do this, we draw on an entirely novel data set which brings together every reported financial transaction between CCGs and private healthcare providers across 173 CCGs. This data allows us to conduct, to our knowledge, the first empirical evaluation of one of the most controversial reforms in England's recent history."</p> |
| <b>Methods</b>            |                 |                                                                                                     |                 |                                                                                                                                                                                                                                                                                                                                                                                                                                                                                                                                                                                         |
| Study design              | 4               | Present key elements of study design early in the paper                                             | 5               | <p>"We ran fixed effects and first differences regression models on the association between outsourcing and treatable mortality, these models will control for all time invariant confounders at the regional level."</p>                                                                                                                                                                                                                                                                                                                                                               |

|                              |    |                                                                                                                                                                                                                                                                                                                                                                                                                                                                                |     |                                                                                                                                                                                                                                                                                            |
|------------------------------|----|--------------------------------------------------------------------------------------------------------------------------------------------------------------------------------------------------------------------------------------------------------------------------------------------------------------------------------------------------------------------------------------------------------------------------------------------------------------------------------|-----|--------------------------------------------------------------------------------------------------------------------------------------------------------------------------------------------------------------------------------------------------------------------------------------------|
| Setting                      | 5  | Describe the setting, locations, and relevant dates, including periods of recruitment, exposure, follow-up, and data collection                                                                                                                                                                                                                                                                                                                                                | 5   | "Data was collected on all live English CCGs as of 2019. Of the full 191 sample, 173 provided at least some machine-readable data between 2013 and 2020"                                                                                                                                   |
| Participants                 | 6  | (a) <i>Cohort study</i> —Give the eligibility criteria, and the sources and methods of selection of participants. Describe methods of follow-up<br><br><i>Case-control study</i> —Give the eligibility criteria, and the sources and methods of case ascertainment and control selection. Give the rationale for the choice of cases and controls<br><br><i>Cross-sectional study</i> —Give the eligibility criteria, and the sources and methods of selection of participants | 5   | "Data was collected on all live English CCGs as of 2019. Of the full 191 sample, 173 provided at least some machine-readable data between 2013 and 2020"                                                                                                                                   |
|                              |    | (b) <i>Cohort study</i> —For matched studies, give matching criteria and number of exposed and unexposed<br><br><i>Case-control study</i> —For matched studies, give matching criteria and the number of controls per case                                                                                                                                                                                                                                                     | 5   | "We also ran our fixed effects model using covariate-balancing with propensity scores based on treatable mortality rates at the beginning of the time-series and the total number of General Practitioners in each CCG."                                                                   |
| Variables                    | 7  | Clearly define all outcomes, exposures, predictors, potential confounders, and effect modifiers. Give diagnostic criteria, if applicable                                                                                                                                                                                                                                                                                                                                       | 4-5 | "Table 1 lists our study variables. The response variable is our measure for healthcare quality, 'treatable mortality'. This is defined as: "deaths that can be mainly avoided through timely and effective healthcare interventions, including secondary prevention and treatment" [17]." |
| Data sources/<br>measurement | 8* | For each variable of interest, give sources of data and details of methods of assessment (measurement). Describe comparability of assessment methods if there is more than one group                                                                                                                                                                                                                                                                                           | 5   | "Full locations of the data as well as a discussion of the data limitations is available in table S.22. Data here is for complete observations included in the analysis. For a description and discussion of missing data see S.21. in supplementary material."                            |

|            |    |                                                           |   |                                                                                                                                                                                                                                                                                                                                                                                                                                                                                                                                                                                                                                                                                      |
|------------|----|-----------------------------------------------------------|---|--------------------------------------------------------------------------------------------------------------------------------------------------------------------------------------------------------------------------------------------------------------------------------------------------------------------------------------------------------------------------------------------------------------------------------------------------------------------------------------------------------------------------------------------------------------------------------------------------------------------------------------------------------------------------------------|
| Bias       | 9  | Describe any efforts to address potential sources of bias | 6 | <p>“To account for potential bias in the main result from the choice of covariates in the model, we present a specification curve in the supplementary materials which is combined with the random error loops (figure S.8.)”</p> <p>“Finally we run the linear fixed effects regression (Table 2, model 1) 173 times, removing a different individual CCG on each loop (see supplementary material S.5.). This was done to check whether any single CCG was primarily driving our overall result. We find that all regressions return a statistically significant, positive result we can therefore be confident that our result is not considerably biased by any single CCG.”</p> |
| Study size | 10 | Explain how the study size was arrived at                 | 5 | <p>“Data was collected on all live English CCGs as of 2019. Of the full 191 sample, 173 provided at least some machine-readable data between 2013 and 2020”</p>                                                                                                                                                                                                                                                                                                                                                                                                                                                                                                                      |



## S.27. GATHER Checklist

| Item number                                                                                           | Checklist item                                                                                                                                                                                                                                                                                                                                   | Page No. | Relevant text from manuscript                                                                                                                                                                                                                                                                                                      |
|-------------------------------------------------------------------------------------------------------|--------------------------------------------------------------------------------------------------------------------------------------------------------------------------------------------------------------------------------------------------------------------------------------------------------------------------------------------------|----------|------------------------------------------------------------------------------------------------------------------------------------------------------------------------------------------------------------------------------------------------------------------------------------------------------------------------------------|
| <b>Objectives and funding</b>                                                                         |                                                                                                                                                                                                                                                                                                                                                  |          |                                                                                                                                                                                                                                                                                                                                    |
| 1                                                                                                     | Define the indicator(s), populations (including age, sex, and geographic entities), and time period(s) for which estimates were made.                                                                                                                                                                                                            | 4-5      | “Table 1 lists our study variables.”<br>“Full locations of the data as well as a discussion of the data limitations is available in table S.22. Data here is for complete observations included in the analysis. For a description and discussion of missing data see S.21. in supplementary material.”                            |
| 2                                                                                                     | List the funding sources for the work.                                                                                                                                                                                                                                                                                                           | 1        | “Funding: This work is supported by The Wellcome Trust [221160/Z/20/Z], [220206/Z/20/Z]”                                                                                                                                                                                                                                           |
| <b>Data inputs</b>                                                                                    |                                                                                                                                                                                                                                                                                                                                                  |          |                                                                                                                                                                                                                                                                                                                                    |
| <i>For all data inputs from multiple sources that are synthesised as part of the study:</i>           |                                                                                                                                                                                                                                                                                                                                                  |          |                                                                                                                                                                                                                                                                                                                                    |
| 3                                                                                                     | Describe how the data were identified and how the data were accessed.                                                                                                                                                                                                                                                                            | 5        | “Full locations of the data as well as a discussion of the data limitations is available in table S.22. Data here is for complete observations included in the analysis. For a description and discussion of missing data see S.21. in supplementary material.”                                                                    |
| 4                                                                                                     | Specify the inclusion and exclusion criteria. Identify all ad-hoc exclusions.                                                                                                                                                                                                                                                                    | 5        | “Data was collected on all live English CCGs as of 2019. Of the full 191 sample, 173 provided at least some machine-readable data between 2013 and 2020, although most of those have years missing due to mergers or missing periods in data publication (see supplementary material S.16. for full description of missing data).” |
| 5                                                                                                     | Provide information about all included data sources and their main characteristics. For each data source used, report reference information or contact name/institution, population represented, data collection method, year(s) of data collection, sex and age range, diagnostic criteria or measurement method, and sample size, as relevant. | 5        | “Full locations of the data as well as a discussion of the data limitations is available in table S.22. Data here is for complete observations included in the analysis. For a description and discussion of missing data see S.21. in supplementary material.”                                                                    |
| 6                                                                                                     | Identify and describe any categories of input data that have potentially important biases (eg, based on characteristics listed in item 5).                                                                                                                                                                                                       | 5        | “Full locations of the data as well as a discussion of the data limitations is available in table S.22. Data here is for complete observations included in the analysis. For a description and discussion of missing data see S.21. in supplementary material.”                                                                    |
| <i>For data inputs that contribute to the analysis but were not synthesised as part of the study:</i> |                                                                                                                                                                                                                                                                                                                                                  |          |                                                                                                                                                                                                                                                                                                                                    |
| 7                                                                                                     | Describe and give sources for any other data inputs.                                                                                                                                                                                                                                                                                             | 5        | “Full locations of the data as well as a discussion of the data limitations is available in table S.22. Data here is for complete observations included in the analysis. For a description and discussion of missing data see S.21. in supplementary material.”                                                                    |
| <i>For all data inputs:</i>                                                                           |                                                                                                                                                                                                                                                                                                                                                  |          |                                                                                                                                                                                                                                                                                                                                    |

|               |                                                                                                                                                                                                                                                                                                                                                                                         |    |                                                                                                                                                                                                                                                                                                                                                                                                                                                                                                                                                                                                                                                                                             |
|---------------|-----------------------------------------------------------------------------------------------------------------------------------------------------------------------------------------------------------------------------------------------------------------------------------------------------------------------------------------------------------------------------------------|----|---------------------------------------------------------------------------------------------------------------------------------------------------------------------------------------------------------------------------------------------------------------------------------------------------------------------------------------------------------------------------------------------------------------------------------------------------------------------------------------------------------------------------------------------------------------------------------------------------------------------------------------------------------------------------------------------|
| 8             | Provide all data inputs in a file format from which data can be efficiently extracted (eg, a spreadsheet rather than a PDF), including all relevant meta-data listed in item 5. For any data inputs that cannot be shared because of ethical or legal reasons, such as third-party ownership, provide a contact name or the name of the institution that retains the right to the data. | 13 | “The extensive code library which accompanies this work can be found at <a href="https://github.com/BenGoodair/CCG-Outsourcing">https://github.com/BenGoodair/CCG-Outsourcing</a> . The data that support the findings of this study are all publicly available, replication materials all available at <a href="https://github.com/BenGoodair/CCG-Outsourcing">https://github.com/BenGoodair/CCG-Outsourcing</a> . Locations of raw data is detailed in supplementary material S.22. CCG expenditure data available from Rahal and Mohan (2022). [16]”                                                                                                                                     |
| Data analysis |                                                                                                                                                                                                                                                                                                                                                                                         |    |                                                                                                                                                                                                                                                                                                                                                                                                                                                                                                                                                                                                                                                                                             |
| 9             | Provide a conceptual overview of the data analysis method. A diagram may be helpful.                                                                                                                                                                                                                                                                                                    | 5  | “We ran fixed effects and first differences regression models on the association between outsourcing and treatable mortality, these models will control for all time invariant confounders at the regional level. We also ran our fixed effects model using covariate-balancing with propensity scores based on treatable mortality rates at the beginning of the time-series and the total number of General Practitioners in each CCG. Covariate balancing is an advanced matching method which can weight values to balance the model, accounting for differences in observations according to their value of a continuous treatment variable, in this case for-profit outsourcing[18].” |
| 10            | Provide a detailed description of all steps of the analysis, including mathematical formulae. This description should cover, as relevant, data cleaning, data pre-processing, data adjustments and weighting of data sources, and mathematical or statistical model(s).                                                                                                                 | 8  | “For full model expressions see supplementary material (S.2.)”                                                                                                                                                                                                                                                                                                                                                                                                                                                                                                                                                                                                                              |
| 11            | Describe how candidate models were evaluated and how the final model(s) were selected.                                                                                                                                                                                                                                                                                                  | 6  | “To account for potential bias in the main result from the choice of covariates in the model, we present a specification curve in the supplementary materials which is combined with the random error loops (figure S.8.)”                                                                                                                                                                                                                                                                                                                                                                                                                                                                  |
| 12            | Provide the results of an evaluation of model performance, if done, as well as the results of any relevant sensitivity analysis.                                                                                                                                                                                                                                                        | 6  | “To check whether potential error in the contract data influences our inferences, we synthetically replicate the effect of error on our findings. By running the regression results 50,000 times, each time multiplying the outsourcing values by random numbers we simulate how random error may impact the study’s findings.”                                                                                                                                                                                                                                                                                                                                                             |
| 13            | Describe methods of calculating uncertainty of the estimates. State which sources of uncertainty were, and were not, accounted for in the uncertainty analysis.                                                                                                                                                                                                                         | 8  | “Robust SEs are clustered at individual level and use a bias-reduced linearization estimator (CR2) [19] Satterthwaite degrees of freedom used in MLM”                                                                                                                                                                                                                                                                                                                                                                                                                                                                                                                                       |

|                        |                                                                                                                                                          |    |                                                                                                                                                                                                                                                                                                                                                                                                                                                                                                                                                         |
|------------------------|----------------------------------------------------------------------------------------------------------------------------------------------------------|----|---------------------------------------------------------------------------------------------------------------------------------------------------------------------------------------------------------------------------------------------------------------------------------------------------------------------------------------------------------------------------------------------------------------------------------------------------------------------------------------------------------------------------------------------------------|
| 14                     | State how analytical or statistical source code used to generate estimates can be accessed.                                                              | 13 | “The extensive code library which accompanies this work can be found at <a href="https://github.com/BenGoodair/CCG-Outsourcing">https://github.com/BenGoodair/CCG-Outsourcing</a> . The data that support the findings of this study are all publicly available, replication materials all available at <a href="https://github.com/BenGoodair/CCG-Outsourcing">https://github.com/BenGoodair/CCG-Outsourcing</a> . Locations of raw data is detailed in supplementary material S.22. CCG expenditure data available from Rahal and Mohan (2022). [16]” |
| Results and discussion |                                                                                                                                                          |    |                                                                                                                                                                                                                                                                                                                                                                                                                                                                                                                                                         |
| 15                     | Provide published estimates in a file format from which data can be efficiently extracted.                                                               | 13 | “The extensive code library which accompanies this work can be found at <a href="https://github.com/BenGoodair/CCG-Outsourcing">https://github.com/BenGoodair/CCG-Outsourcing</a> . The data that support the findings of this study are all publicly available, replication materials all available at <a href="https://github.com/BenGoodair/CCG-Outsourcing">https://github.com/BenGoodair/CCG-Outsourcing</a> . Locations of raw data is detailed in supplementary material S.22. CCG expenditure data available from Rahal and Mohan (2022). [16]” |
| 16                     | Report a quantitative measure of the uncertainty of the estimates (eg, uncertainty intervals).                                                           | 8  | 95% Cis reported in table                                                                                                                                                                                                                                                                                                                                                                                                                                                                                                                               |
| 17                     | Interpret results in light of existing evidence. If updating a previous set of estimates, describe the reasons for changes in estimates.                 |    | No previous estimates of this relationship                                                                                                                                                                                                                                                                                                                                                                                                                                                                                                              |
| 18                     | Discuss limitations of the estimates. Include a discussion of any modelling assumptions or data limitations that affect interpretation of the estimates. | 13 | “The associational nature of our findings cannot rule out the possibility of residual confounding, consequently our findings should not be interpreted as necessarily evidencing a causal relationship between outsourcing and mortality rates. The expenditure data does not contain information on the specific services provided by the supplier, as such there remains further research needed to distinguish if some acute services are primarily causing the relationship we observe.”                                                            |

### S.28. Study protocol and data analysis plan statements

There was no study protocol or data analysis plan for this research. No sensitive data is included in the research and, as such, no ethics approval was sought.
